# Supplementary material for: Sodium-Glucose Cotransporter 2 Inhibitors vs Incretin-Based Drugs and Risk of Fractures for Type 2 Diabetes
Source: PubMed Central journal article supplement (PMC10523172; doi:10.1001/jamanetworkopen.2023.35797), 2023-09-26
Supplement: jamanetwopen-e2335797-s001.pdf [file jamanetwopen-e2335797-s001.pdf]

## Supplemental Online Content

Ko HY, Bea S, Jeong HE, et al. Sodium-glucose cotransporter 2 inhibitors vs incretin-based drugs and risk of fractures for type 2 diabetes. *JAMA Netw Open*. 2023;6(9):e2335797. doi:10.1001/jamanetworkopen.2023.35797

**eFigure 1.** Flowchart of study participants selection

**eFigure 2.** Flowchart of study participants selection

**eFigure 3.** Cumulative incidence function plots for overall fractures among weighted populations

**eFigure 4.** Overall study design

**eFigure 5.** Propensity score distribution of before and after weighting in both cohorts

**eTable 1.** Baseline characteristics of patients received SGLT2 inhibitors or comparator drugs, before weighting by propensity score fine stratification

**eTable 2.** Association between the use of SGLT2 inhibitors and the risk of fractures compared with the use of DPP4 inhibitors

**eTable 3.** Results of subgroup analyses with events, person-years, weighted IRs (per 100 person-years), weighted HRs with 95% CIs, and p for interaction for the association between the use of SGLT2 inhibitors vs. DPP4 inhibitors and the risk of overall fractures

**eTable 4.** Results of sensitivity analyses with events, person-years, weighted IRs (per 100 person-years), weighted HRs and 95% CIs for the association between the use of SGLT2 inhibitors vs. DPP4 inhibitors and the risk of overall fractures

**eTable 5.** Association between the use of SGLT2 inhibitors and the risk of fractures compared with the use of GLP-1 receptor agonists

**eTable 6.** Results of subgroup analyses with events, person-years, weighted IRs (per 100 person-years), weighted HRs with 95% CIs, and p for interaction for the association between the use of SGLT2 inhibitors vs. GLP-1 receptor agonists and the risk of overall fractures

**eTable 7.** Results of sensitivity analyses with events, person-years, weighted IRs (per 100 person-years), weighted HRs and 95% CIs for the association between the use of SGLT2 inhibitors vs. GLP-1 receptor agonists and the risk of overall fractures

**eTable 8.** Reasons for the end of follow-up among weighted populations received SGLT2 inhibitors or DPP4 inhibitors

**eTable 9.** Reasons for the end of follow-up among weighted populations received SGLT2 inhibitors or GLP-1 receptor agonists

**eTable 10.** Laboratory test results and missing rates of patients receiving SGLT2 inhibitors or comparator drugs before propensity score based fine stratification

**eTable 11.** Baseline characteristics after weighting by propensity score stratification in patients receiving SGLT2 inhibitors or comparator drugs with bone mineral density test results present

**eTable 12.** Baseline characteristics before weighting by propensity score stratification in patients receiving SGLT2 inhibitors or comparator drugs with bone mineral density test results present

**eTable 13.** Association between the use of SGLT2 inhibitors and the risk of overall fractures among weighted populations with bone mineral density test results present

**eTable 14.** International Classification of Diseases-10 (ICD-10) and domestic procedure codes for identification of fractures

**eTable 15.** International Classification of Diseases-10 (ICD-10) codes for identification of covariates

**eTable 16.** Anatomical Therapeutic Chemical (ATC) classification codes for identification of covariates

This supplemental material has been provided by the authors to give readers additional information about their work.

**eTable 1. Baseline characteristics of patients received SGLT2 inhibitors or comparator drugs, before weighting by propensity score fine stratification.**

| Baseline characteristics                          | Patients, No. (%)    |                      |       |                       |                     |        |
|---------------------------------------------------|----------------------|----------------------|-------|-----------------------|---------------------|--------|
|                                                   | SGLT2i vs. DPP4i     |                      |       | SGLT2i vs. GLP1RA     |                     |        |
|                                                   | SGLT2i<br>(n=37,532) | DPP4i<br>(n=332,038) | ASD   | SGLT2i<br>(n=113,622) | GLP1RA<br>(n=8,181) | ASD    |
| <b>Cohort entry year</b>                          |                      |                      |       |                       |                     |        |
| 2014                                              | 1232 (3.3)           | 18218 (5.5)          | 0.108 | 2999 (2.6)            | 17 (0.2)            | 0.206  |
| 2015                                              | 3922 (10.4)          | 65460 (19.7)         | 0.261 | 10701 (9.4)           | 105 (1.3)           | 0.368  |
| 2016                                              | 5220 (13.9)          | 60320 (18.2)         | 0.116 | 16847 (14.8)          | 703 (8.6)           | 0.195  |
| 2017                                              | 6310 (16.8)          | 52029 (15.7)         | 0.031 | 19557 (17.2)          | 1745 (21.3)         | 0.105  |
| 2018                                              | 5815 (15.5)          | 47041 (14.2)         | 0.037 | 18337 (16.1)          | 1970 (24.1)         | 0.199  |
| 2019                                              | 7415 (19.8)          | 44649 (13.4)         | 0.17  | 23214 (20.4)          | 2076 (25.4)         | 0.118  |
| 2020                                              | 7618 (20.3)          | 44321 (13.3)         | 0.187 | 21967 (19.3)          | 1565 (19.1)         | 0.005  |
| <b>Age, mean (SD), y</b>                          | 60.6 (9.7)           | 66.0 (11)            | 0.528 | 61.4 (9.8)            | 62.5 (10.2)         | 0.113  |
| <b>Age group</b>                                  |                      |                      | 0.460 |                       |                     | 0.116  |
| 45-65                                             | 26761 (71.3)         | 163966 (49.4)        |       | 77299 (68.0)          | 5114 (62.7)         |        |
| >65                                               | 10771 (28.7)         | 168072 (50.6)        |       | 36323 (32.0)          | 3067 (37.5)         |        |
| <b>Diabetic medications</b>                       |                      |                      |       |                       |                     |        |
| Alpha-glucosidase inhibitors                      | 1141 (3)             | 16328 (4.9)          | 0.096 | 3151 (2.8)            | 249 (3)             | 0.016  |
| GLP1RA                                            | 126 (0.3)            | 262 (0.1)            | 0.056 |                       |                     |        |
| DPP4i                                             |                      |                      |       | 68438 (60.2)          | 6592 (80.6)         | 0.457  |
| Insulin                                           | 3260 (8.7)           | 34351 (10.3)         | 0.057 | 15720 (13.8)          | 4050 (49.5)         | 0.830  |
| Meglitinides                                      | 191 (0.5)            | 2845 (0.9)           | 0.042 | 580 (0.5)             | 113 (1.4)           | 0.090  |
| Metformin                                         | 21189 (56.5)         | 205528 (61.9)        | 0.111 | 90862 (80)            | 7137 (87.2)         | 0.197  |
| Sulfonylureas                                     | 9388 (25)            | 112599 (33.9)        | 0.196 | 53297 (46.9)          | 5446 (66.6)         | 0.405  |
| Thiazolidinediones                                | 2709 (7.2)           | 17376 (5.2)          | 0.082 | 15910 (14)            | 1502 (18.4)         | 0.119  |
| <b>Number of diabetic medications being taken</b> |                      |                      |       |                       |                     |        |
| 0-1                                               | 26470 (70.5)         | 210488 (63.4)        | 0.152 | 31141 (27.4)          | 481 (5.9)           | 0.604  |
| 2-3                                               | 10753 (28.7)         | 118182 (35.6)        | 0.149 | 69321 (61)            | 5388 (65.9)         | 0.101  |
| 4+                                                | 309 (0.8)            | 3368 (1.0)           | 0.02  | 13160 (11.6)          | 2312 (28.3)         | 0.427  |
| <b>Level of diabetes treatment<sup>a</sup></b>    |                      |                      |       |                       |                     |        |
| 1                                                 | 25926 (69.1)         | 205195 (61.8)        | 0.153 | 30405 (26.8)          | 307 (3.8)           | 0.675  |
| 2                                                 | 8346 (22.2)          | 92492 (27.9)         | 0.13  | 67497 (59.4)          | 3824 (46.7)         | 0.256  |
| 3                                                 | 3260 (8.7)           | 34351 (10.3)         | 0.057 | 15720 (13.8)          | 4050 (49.5)         | 0.830  |
| <b>Diabetes related conditions</b>                |                      |                      |       |                       |                     |        |
| Diabetic nephropathy                              | 1148 (3.1)           | 11072 (3.3)          | 0.016 | 5837 (5.1)            | 818 (10)            | 0.185  |
| Diabetic neuropathy                               | 4595 (12.2)          | 46904 (14.1)         | 0.056 | 20766 (18.3)          | 2300 (28.1)         | 0.235  |
| Diabetic retinopathy                              | 5730 (15.3)          | 57925 (17.4)         | 0.059 | 25807 (22.7)          | 3241 (39.6)         | 0.371  |
| Hypoglycaemia                                     | 130 (0.3)            | 2292 (0.7)           | 0.048 | 549 (0.5)             | 57 (0.7)            | 0.028  |
| <b>Charlson Comorbidity Index</b>                 |                      |                      |       |                       |                     |        |
| 0                                                 | 19584 (52.2)         | 162136 (48.8)        | 0.067 | 50365 (44.3)          | 2438 (29.8)         | 0.304  |
| 1                                                 | 10586 (28.2)         | 100633 (30.3)        | 0.046 | 41092 (36.2)          | 4063 (49.7)         | 0.275  |
| 2                                                 | 4385 (11.7)          | 38384 (11.6)         | 0.004 | 11040 (9.7)           | 564 (6.9)           | 0.102  |
| ≥3                                                | 2977 (7.9)           | 30885 (9.3)          | 0.049 | 11125 (9.8)           | 1116 (13.6)         | 0.120  |
| <b>Number of outpatient visits</b>                |                      |                      |       |                       |                     |        |
| 0-2                                               | 1038 (2.8)           | 11288 (3.4)          | 0.037 | 1458 (1.3)            | 48 (0.6)            | 0.072  |
| 3-5                                               | 1738 (4.6)           | 13108 (3.9)          | 0.034 | 3146 (2.8)            | 96 (1.2)            | 0.115  |
| 6+                                                | 34756 (92.6)         | 307642 (92.7)        | 0.002 | 109018<br>(95.9)      | 8037 (98.2)         | 0.137  |
| <b>Number of hospitalizations</b>                 |                      |                      |       |                       |                     |        |
| 0                                                 | 30119 (80.2)         | 257820 (77.6)        | 0.064 | 86862 (76.4)          | 5558 (67.9)         | 0.191  |
| 1-2                                               | 6815 (18.2)          | 67448 (20.3)         | 0.055 | 24012 (21.1)          | 2298 (28.1)         | 0.162  |
| 3+                                                | 598 (1.6)            | 6770 (2)             | 0.033 | 2748 (2.4)            | 325 (4)             | 0.088  |
| <b>Comorbidities</b>                              |                      |                      |       |                       |                     |        |
| Asthma                                            | 3250 (8.7)           | 30065 (9.1)          | 0.014 | 9703 (8.5)            | 698 (8.5)           | <0.001 |
| Chronic kidney disease                            | 201 (0.5)            | 4336 (1.3)           | 0.081 | 1161 (1)              | 345 (4.2)           | 0.201  |
| Congestive heart failure                          | 1482 (3.9)           | 14040 (4.2)          | 0.014 | 4847 (4.3)            | 362 (4.4)           | 0.008  |
| COPD                                              | 2036 (5.4)           | 21095 (6.4)          | 0.039 | 6282 (5.5)            | 477 (5.8)           | 0.013  |
| Dementia                                          | 1002 (2.7)           | 20174 (6.1)          | 0.167 | 3726 (3.3)            | 446 (5.5)           | 0.106  |
| Epilepsy                                          | 227 (0.6)            | 2318 (0.7)           | 0.012 | 692 (0.6)             | 72 (0.9)            | 0.032  |
| Gout                                              | 260 (0.7)            | 2525 (0.8)           | 0.008 | 835 (0.7)             | 80 (1)              | 0.026  |

| Baseline characteristics        | Patients, No. (%)    |                      |        |                       |                     |       |
|---------------------------------|----------------------|----------------------|--------|-----------------------|---------------------|-------|
|                                 | SGLT2i vs. DPP4i     |                      |        | SGLT2i vs. GLP1RA     |                     |       |
|                                 | SGLT2i<br>(n=37,532) | DPP4i<br>(n=332,038) | ASD    | SGLT2i<br>(n=113,622) | GLP1RA<br>(n=8,181) | ASD   |
| Hyperlipidemia                  | 16976 (45.2)         | 130874 (39.4)        | 0.118  | 53250 (46.9)          | 4065 (49.7)         | 0.057 |
| Hypertension                    | 20255 (54)           | 186083 (56)          | 0.042  | 61347 (54)            | 4082 (49.9)         | 0.082 |
| Ischemic heart disease          | 3274 (8.7)           | 27042 (8.1)          | 0.021  | 11248 (9.9)           | 906 (11.1)          | 0.038 |
| Liver cirrhosis                 | 144 (0.4)            | 2047 (0.6)           | 0.033  | 640 (0.6)             | 77 (0.9)            | 0.044 |
| Osteoarthritis                  | 12547 (33.4)         | 121104 (36.5)        | 0.064  | 39159 (34.5)          | 2939 (35.9)         | 0.031 |
| Osteoporosis                    | 3268 (8.7)           | 41189 (12.4)         | 0.121  | 10149 (8.9)           | 766 (9.4)           | 0.015 |
| Paget's disease                 | 0 (0)                | 2 (0)                | 0.003  | 0 (0)                 | 0 (0)               |       |
| Parkinson's disease             | 129 (0.3)            | 2748 (0.8)           | 0.063  | 502 (0.4)             | 63 (0.8)            | 0.042 |
| Rheumatoid arthritis            | 779 (2.1)            | 7853 (2.4)           | 0.02   | 2405 (2.1)            | 192 (2.3)           | 0.016 |
| Stroke                          | 1068 (2.8)           | 16715 (5)            | 0.113  | 3966 (3.5)            | 391 (4.8)           | 0.065 |
| Thyroid disease                 | 2951 (7.9)           | 21697 (6.5)          | 0.051  | 8269 (7.3)            | 622 (7.6)           | 0.012 |
| <b>Fall related medications</b> |                      |                      |        |                       |                     |       |
| ACE inhibitors or ARBs          | 19036 (50.7)         | 161173 (48.5)        | 0.044  | 61668 (54.3)          | 4847 (59.2)         | 0.100 |
| Anticholinergics                | 30175 (80.4)         | 265609 (80)          | 0.01   | 92815 (81.7)          | 6721 (82.2)         | 0.012 |
| Benzodiazepines                 | 13566 (36.1)         | 128618 (38.7)        | 0.054  | 42268 (37.2)          | 3150 (38.5)         | 0.027 |
| beta-blockers                   | 1848 (4.9)           | 16078 (4.8)          | 0.004  | 5599 (4.9)            | 424 (5.2)           | 0.012 |
| Calcium channel blockers        | 14619 (39)           | 137681 (41.5)        | 0.051  | 44490 (39.2)          | 3262 (39.9)         | 0.015 |
| Diuretics                       | 9572 (25.5)          | 88296 (26.6)         | 0.025  | 29395 (25.9)          | 2014 (24.6)         | 0.029 |
| Nitrates                        | 470 (1.3)            | 3923 (1.2)           | 0.006  | 1664 (1.5)            | 147 (1.8)           | 0.026 |
| Opioids                         | 2876 (7.7)           | 24502 (7.4)          | 0.011  | 9761 (8.6)            | 822 (10)            | 0.050 |
| Sedative hypnotics              | 3976 (10.6)          | 37574 (11.3)         | 0.023  | 12690 (11.2)          | 1067 (13)           | 0.057 |
| Tricyclic antidepressant        | 2633 (7)             | 27112 (8.2)          | 0.043  | 9176 (8.1)            | 891 (10.9)          | 0.096 |
| Typical antipsychotics          | 1227 (3.3)           | 12431 (3.7)          | 0.026  | 3913 (3.4)            | 386 (4.7)           | 0.064 |
| <b>Osteoporosis medications</b> |                      |                      |        |                       |                     |       |
| Bisphosphonates                 | 1738 (4.6)           | 25361 (7.6)          | 0.126  | 5645 (5)              | 451 (5.5)           | 0.024 |
| Calcium/vitamin D               | 2904 (7.7)           | 29980 (9)            | 0.047  | 9440 (8.3)            | 892 (10.9)          | 0.088 |
| Parathyroid hormone/calcitonin  | 109 (0.3)            | 1725 (0.5)           | 0.036  | 394 (0.3)             | 21 (0.3)            | 0.016 |
| RANKL inhibitors                | 134 (0.4)            | 1105 (0.3)           | 0.004  | 470 (0.4)             | 43 (0.5)            | 0.016 |
| SERMs                           | 440 (1.2)            | 4719 (1.4)           | 0.022  | 1357 (1.2)            | 129 (1.6)           | 0.033 |
| <b>Comedications</b>            |                      |                      |        |                       |                     |       |
| Anticoagulants                  | 1287 (3.4)           | 11368 (3.4)          | <0.001 | 4680 (4.1)            | 374 (4.6)           | 0.022 |
| Anticonvulsants                 | 4302 (11.5)          | 42083 (12.7)         | 0.037  | 17418 (15.3)          | 2042 (25)           | 0.242 |
| Antidepressants                 | 2806 (7.5)           | 26310 (7.9)          | 0.017  | 9304 (8.2)            | 864 (10.6)          | 0.081 |
| Aromatase inhibitors            | 2 (0)                | 5 (0)                | 0.007  | 4 (0)                 | 0 (0)               | 0.008 |
| Oral corticosteroids            | 14827 (39.5)         | 125659 (37.8)        | 0.034  | 42449 (37.4)          | 2784 (34)           | 0.070 |
| Hormone replacement therapy     | 2180 (5.8)           | 14532 (4.4)          | 0.065  | 6406 (5.6)            | 479 (5.9)           | 0.009 |
| Immunosuppressants              | 114 (0.3)            | 1670 (0.5)           | 0.031  | 384 (0.3)             | 53 (0.6)            | 0.044 |
| NSAIDs                          | 25972 (69.2)         | 228672 (68.9)        | 0.007  | 80339 (70.7)          | 5877 (71.8)         | 0.025 |
| Platelet inhibitors             | 23794 (63.4)         | 222651 (67.1)        | 0.077  | 76722 (67.5)          | 5960 (72.9)         | 0.117 |
| Proton-pump inhibitors          | 14687 (39.1)         | 121518 (36.6)        | 0.052  | 47026 (41.4)          | 3713 (45.4)         | 0.081 |
| Statins                         | 22389 (59.7)         | 186734 (56.2)        | 0.069  | 80362 (70.7)          | 6649 (81.3)         | 0.249 |

**Abbreviations:** ACE, angiotensin converting enzyme; ARBs, angiotensin receptor blockers; ASD, absolute standardized difference; COPD, chronic obstructive pulmonary disorder; DPP4i, dipeptidyl peptidase 4 inhibitors; GLP1RA, glucagon like peptide 1 receptor agonists; IQR, interquartile range; NSAIDs, nonsteroidal anti-inflammatory drugs; RANKL, receptor activator of nuclear factors kappa B ligand; SD, standard deviation; SERMs, selective estrogen receptor modulator; SGLT2i, sodium glucose cotransporter 2 inhibitors

<sup>a</sup>Defined depending on the number of antidiabetic medication (excluding the study drugs of interest), prescribed in the year preceding the index date: level 1, as taking none or only one class of antidiabetic medication other than insulin, level 2, as taking  $\geq 2$  different classes of antidiabetic medication without insulin, and level 3, as taking insulin with or without other classes of antidiabetic medication.

**eFigure 1. Flowchart of study participants selection**

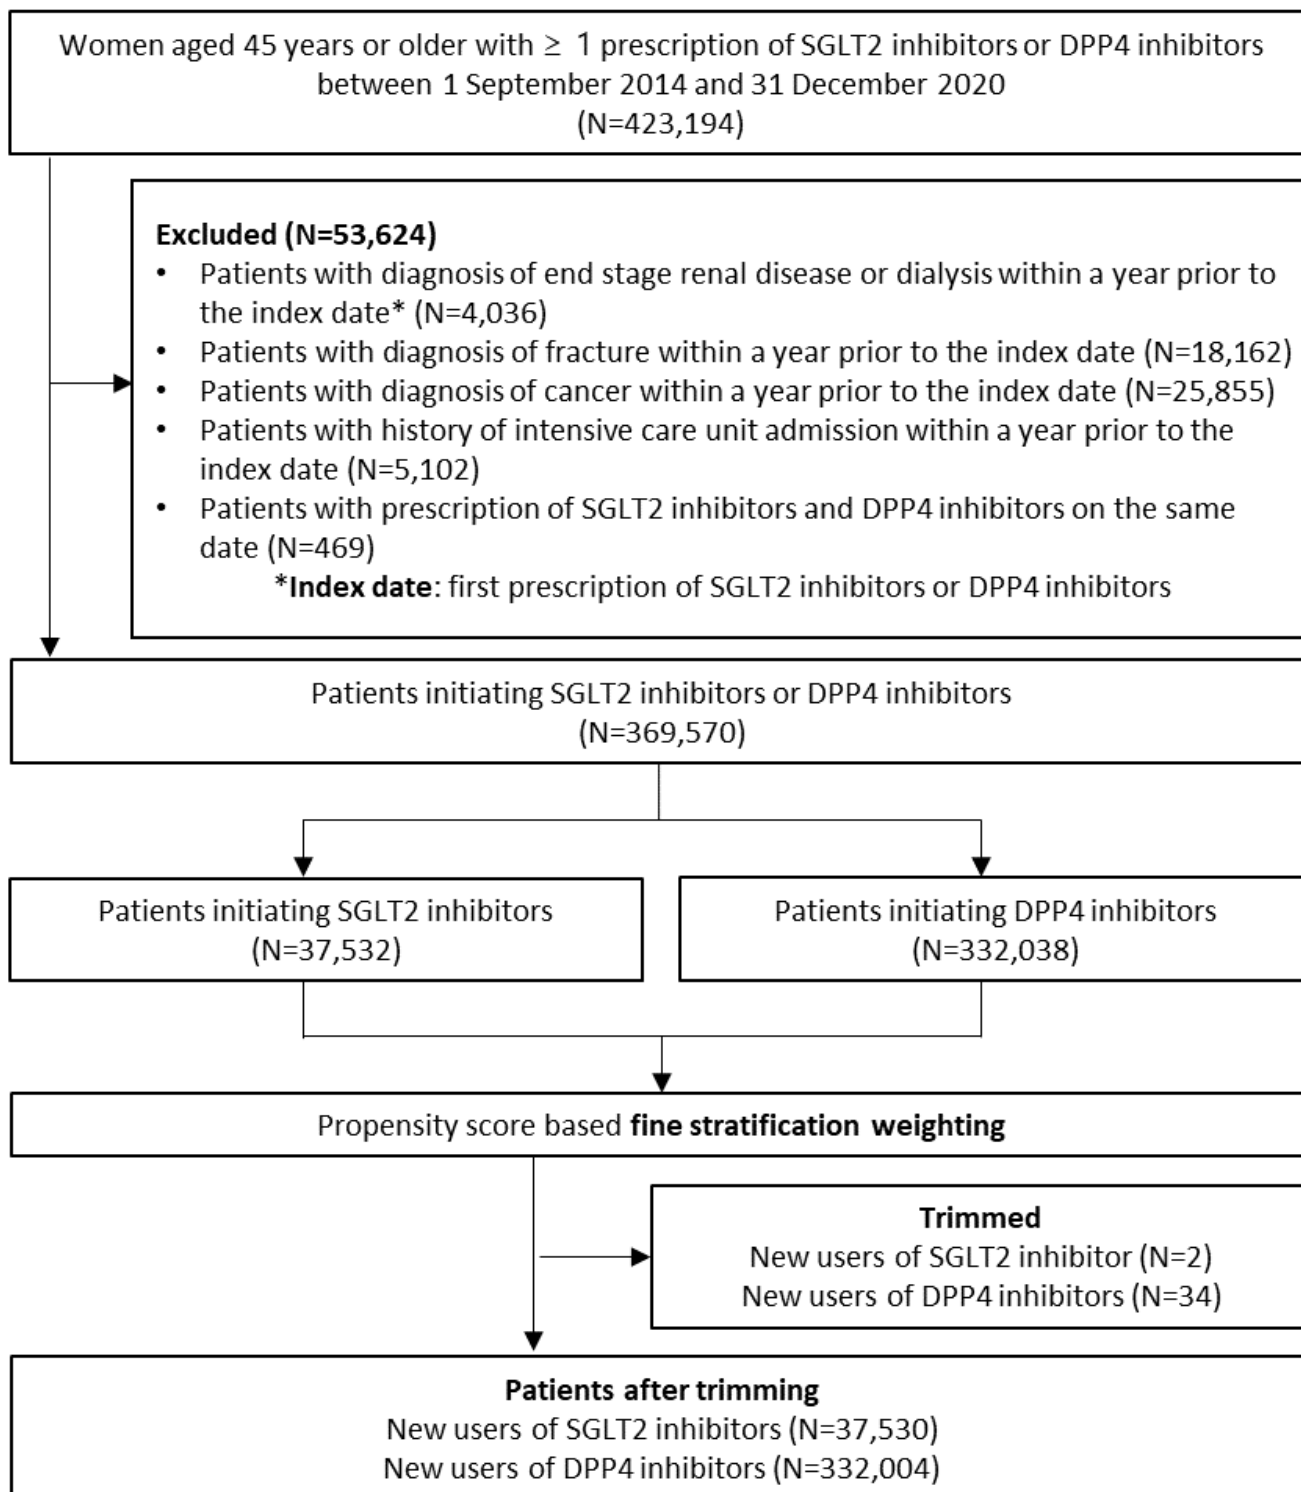

**Abbreviations:** DPP4, dipeptidyl peptidase 4; SGLT2, sodium glucose cotransporter 2

**eTable 2. Association between the use of SGLT2 inhibitors and the risk of fractures compared with the use of DPP4 inhibitors.**

| Outcome                   | SGLT2 inhibitors |              |                                      | DPP4 inhibitors |              |                                      | Weighted HR<br>(95% CI) |
|---------------------------|------------------|--------------|--------------------------------------|-----------------|--------------|--------------------------------------|-------------------------|
|                           | Events           | Person-years | Weighted IR <sup>a</sup><br>(95% CI) | Events          | Person-years | Weighted IR <sup>a</sup><br>(95% CI) |                         |
| <b>Primary outcome</b>    |                  |              |                                      |                 |              |                                      |                         |
| Overall fractures         | 768              | 54,619       | 1.41 (1.31-1.51)                     | 18,800          | 693,818      | 1.81 (1.78-1.85)                     | 0.78 (0.72-0.84)        |
| <b>Secondary outcomes</b> |                  |              |                                      |                 |              |                                      |                         |
| Vertebral fractures       | 376              | 55,121       | 0.68 (0.61-0.75)                     | 10,540          | 707,825      | 0.96 (0.93-0.98)                     | 0.71 (0.64-0.79)        |
| Hip fractures             | 82               | 55,531       | 0.15 (0.12-0.18)                     | 3,532           | 720,842      | 0.25 (0.23-0.26)                     | 0.61 (0.49-0.76)        |
| Humerus fractures         | 67               | 55,512       | 0.12 (0.09-0.15)                     | 1,647           | 722,725      | 0.18 (0.16-0.19)                     | 0.70 (0.54-0.89)        |
| Distal radius fractures   | 262              | 55,237       | 0.47 (0.42-0.54)                     | 4,559           | 716,789      | 0.52 (0.50-0.53)                     | 0.93 (0.82-1.05)        |

**Abbreviations:** CI, confidence interval; DPP4, dipeptidyl peptidase 4; HR, hazard ratio; IR, incidence rate; PS, propensity score; SGLT2, sodium glucose cotransporter 2

<sup>a</sup>per 100 person-years

**eTable 3. Results of subgroup analyses with events, person-years, weighted IRs (per 100 person-years), weighted HRs with 95% CIs, and p for interaction for the association between the use of SGLT2 inhibitors vs. DPP4 inhibitors and the risk of overall fractures.**

| Stratification                     | SGLT2 inhibitors |              |                                   | DPP4 inhibitors |              |                                   | Weighted HR (95% CI) | P for interaction |
|------------------------------------|------------------|--------------|-----------------------------------|-----------------|--------------|-----------------------------------|----------------------|-------------------|
|                                    | Events           | Person-years | Weighted IR <sup>a</sup> (95% CI) | Events          | Person-years | Weighted IR <sup>a</sup> (95% CI) |                      |                   |
| <b>Age group</b>                   |                  |              |                                   |                 |              |                                   |                      |                   |
| 45-60                              | 236              | 31,585       | 0.75 (0.65-0.85)                  | 2,178           | 244,077      | 0.80 (0.76-0.84)                  | 0.95 (0.83-1.09)     |                   |
| 61-75                              | 363              | 19,538       | 1.86 (1.67-2.06)                  | 8,692           | 315,431      | 2.49 (2.43-2.55)                  | 0.75 (0.67-0.83)     | 0.0196            |
| >75                                | 169              | 3,496        | 4.84 (4.14-5.63)                  | 7,930           | 134,309      | 5.59 (5.46-5.73)                  | 0.85 (0.73-0.99)     | 0.5097            |
| <b>Diagnosis of osteoporosis</b>   |                  |              |                                   |                 |              |                                   |                      |                   |
| Yes                                | 100              | 4,128        | 2.42 (1.97-2.95)                  | 3,622           | 83,787       | 3.49 (3.35-3.63)                  | 0.69 (0.56-0.84)     |                   |
| No                                 | 668              | 50,492       | 1.32 (1.22-1.43)                  | 15,178          | 610,031      | 1.66 (1.62-1.69)                  | 0.80 (0.74-0.87)     | 0.3542            |
| <b>Osteoporosis medication use</b> |                  |              |                                   |                 |              |                                   |                      |                   |
| Yes                                | 136              | 5,998        | 2.27 (1.90-2.68)                  | 4,463           | 107,033      | 3.18 (3.07-3.30)                  | 0.71 (0.60-0.85)     |                   |
| No                                 | 632              | 48,621       | 1.30 (1.20-1.41)                  | 14,337          | 586,785      | 1.63 (1.59-1.66)                  | 0.80 (0.74-0.87)     | 0.3447            |
| <b>Diagnosis of osteoarthritis</b> |                  |              |                                   |                 |              |                                   |                      |                   |
| Yes                                | 315              | 17,603       | 1.79 (1.60-2.00)                  | 8,733           | 250,381      | 2.54 (2.47-2.60)                  | 0.70 (0.63-0.79)     |                   |
| No                                 | 453              | 37,016       | 1.22 (1.11-1.34)                  | 10,067          | 443,437      | 1.45 (1.41-1.49)                  | 0.85 (0.77-0.93)     | <b>0.0203</b>     |
| <b>Neurological dysfunction</b>    |                  |              |                                   |                 |              |                                   |                      |                   |
| <b>Yes</b>                         | 91               | 2,741        | 3.32 (2.67-4.08)                  | 3,510           | 63,377       | 4.29 (4.12-4.45)                  | 0.76 (0.62-0.94)     |                   |
| <b>No</b>                          | 677              | 51,879       | 1.30 (1.21-1.41)                  | 15,290          | 630,440      | 1.68 (1.64-1.71)                  | 0.78 (0.72-0.84)     | 0.7675            |
| <b>Thiazolidinediones use</b>      |                  |              |                                   |                 |              |                                   |                      |                   |
| Yes                                | 76               | 4,548        | 1.67 (1.32-2.09)                  | 1,423           | 39,422       | 2.54 (2.39-2.71)                  | 0.65 (0.52-0.82)     |                   |
| No                                 | 692              | 50,071       | 1.38 (1.28-1.49)                  | 17,377          | 654,396      | 1.75 (1.71-1.78)                  | 0.79 (0.73-0.86)     | 0.1436            |
| <b>Proton-Pump Inhibitor use</b>   |                  |              |                                   |                 |              |                                   |                      |                   |
| Yes                                | 316              | 19,804       | 1.60 (1.42-1.78)                  | 7,364           | 236,509      | 2.17 (2.11-2.24)                  | 0.73 (0.66-0.82)     |                   |
| No                                 | 452              | 34,816       | 1.30 (1.18-1.42)                  | 11,436          | 457,309      | 1.61 (1.57-1.65)                  | 0.81 (0.74-0.89)     | 0.2375            |
| <b>Oral corticosteroids use</b>    |                  |              |                                   |                 |              |                                   |                      |                   |
| Yes                                | 314              | 20,969       | 1.50 (1.34-1.67)                  | 7,235           | 256,652      | 1.93 (1.87-1.98)                  | 0.78 (0.69-0.87)     |                   |
| No                                 | 454              | 33,650       | 1.35 (1.23-1.48)                  | 11,565          | 437,166      | 1.74 (1.70-1.78)                  | 0.78 (0.71-0.85)     | 0.7732            |
| <b>SSRIs use</b>                   |                  |              |                                   |                 |              |                                   |                      |                   |
| Yes                                | 21               | 1,153        | 1.82 (1.13-2.79)                  | 555             | 13,842       | 2.51 (2.24-2.82)                  | 0.71 (0.45-1.11)     |                   |
| No                                 | 747              | 53,466       | 1.40 (1.30-1.50)                  | 18,245          | 679,976      | 1.80 (1.76-1.83)                  | 0.78 (0.72-0.84)     | 0.4786            |
| <b>Fall-related medication use</b> |                  |              |                                   |                 |              |                                   |                      |                   |
| Yes                                | 744              | 51,240       | 1.45 (1.35-1.56)                  | 18,038          | 650,753      | 1.86 (1.82-1.89)                  | 0.78 (0.73-0.84)     |                   |
| No                                 | 24               | 3,379        | 0.71 (0.46-1.06)                  | 762             | 43,065       | 1.10 (1.00-1.21)                  | 0.65 (0.43-0.98)     | 0.2449            |
| <b>Type of SGLT2 inhibitors</b>    |                  |              |                                   |                 |              |                                   |                      |                   |
| Dapagliflozin                      | 480              | 35,021       | 1.37 (1.25-1.50)                  | 18,800          | 693,818      | 1.81 (1.78-1.85)                  | 0.76 (0.69-0.83)     |                   |
| Empagliflozin                      | 236              | 15,885       | 1.49 (1.30-1.69)                  | 18,800          | 693,818      | 1.80 (1.76-1.85)                  | 0.82 (0.72-0.94)     |                   |
| Ipragliflozin                      | 9                | 494          | 1.83 (0.83-3.47)                  | 18,800          | 693,818      | 1.65 (1.58-1.72)                  | 1.11 (0.58-2.13)     |                   |

|               |    |       |                  |        |         |                  |                  |
|---------------|----|-------|------------------|--------|---------|------------------|------------------|
| Ertugliflozin | 43 | 3,219 | 1.34 (0.97-1.80) | 18,800 | 693,818 | 1.81 (1.78-1.84) | 0.74 (0.55-0.99) |
|---------------|----|-------|------------------|--------|---------|------------------|------------------|

---

**Abbreviations:** CI, confidence interval; DPP4, dipeptidyl peptidase 4; HR, hazard ratio; IR, incidence rate; SGLT2, sodium glucose cotransporter 2; SSRIs, selective serotonin receptor inhibitors  
\*per 100 person-years

**eTable 4. Results of sensitivity analyses with events, person-years, weighted IRs (per 100 person-years), weighted HRs and 95% CIs for the association between the use of SGLT2 inhibitors vs. DPP4 inhibitors and the risk of overall fractures.**

| Analyses                                          | SGLT2 inhibitors |              |                                   | DPP4 inhibitors |              |                                   | Weighted HR (95% CI) |
|---------------------------------------------------|------------------|--------------|-----------------------------------|-----------------|--------------|-----------------------------------|----------------------|
|                                                   | Events           | Person-years | Weighted IR <sup>a</sup> (95% CI) | Events          | Person-years | Weighted IR <sup>a</sup> (95% CI) |                      |
| History of surgical menopause                     | 7                | 717          | 0.98 (0.39-2.01)                  | 75              | 5,046        | 0.79 (0.54-1.13)                  | 1.25 (0.56-2.81)     |
| Hormone replacement therapy                       | 28               | 3,112        | 0.90 (0.60-1.30)                  | 384             | 30,900       | 1.05 (0.92-1.18)                  | 0.86 (0.58-1.28)     |
| Laboratory results included analysis <sup>b</sup> | 768              | 54,619       | 1.36 (1.23-1.50)                  | 18,800          | 693,818      | 1.74 (1.69-1.78)                  | 0.79 (0.71-0.87)     |
| Extended look-back period <sup>c</sup>            | 768              | 54,619       | 1.41 (1.31-1.51)                  | 18,800          | 693,818      | 1.81 (1.78-1.85)                  | 0.78 (0.72-0.84)     |
| Varying grace period                              |                  |              |                                   |                 |              |                                   |                      |
| 30-day                                            | 649              | 46,838       | 1.38 (1.28-1.49)                  | 14,751          | 565,254      | 1.73 (1.69-1.77)                  | 0.80 (0.74-0.87)     |
| 60-day                                            | 731              | 52,253       | 1.40 (1.30-1.50)                  | 17,535          | 654,528      | 1.78 (1.74-1.81)                  | 0.79 (0.73-0.85)     |
| Stringent outcome definition                      | 289              | 41,556       | 0.70 (0.62-0.78)                  | 6,747           | 522,940      | 0.86 (0.83-0.88)                  | 0.81 (0.72-0.91)     |
| Control outcomes                                  |                  |              |                                   |                 |              |                                   |                      |
| Herpes zoster virus infection                     | 1,563            | 52,410       | 2.98 (2.84-3.13)                  | 19,824          | 687,464      | 2.89 (2.84-2.93)                  | 1.03 (0.97-1.08)     |
| Hospitalization for heart failure                 | 88               | 54,287       | 0.16 (0.13-0.20)                  | 3,121           | 714,496      | 0.27 (0.26-0.28)                  | 0.60 (0.48-0.74)     |

**Abbreviations:** CI, confidence interval; DPP4, dipeptidyl peptidase 4; HR, hazard ratio; IR, incidence rate; SGLT2, sodium glucose cotransporter 2

<sup>a</sup>per 100 person-years

<sup>b</sup>Laboratory test results were assessed within 3 years prior to the index date and the most recent value was included. Included lab variables comprised waist circumference, body mass index, fasting blood glucose, systolic blood pressure, diastolic blood pressure, total cholesterol, low density lipoprotein cholesterol, high density lipoprotein cholesterol, triglycerides, serum creatinine, estimated glomerular filtration rate, aspartate aminotransferase level, alanine aminotransferase level, gamma glutamyl transferase level, and smoking behavior, which presented varying missing rates of 27.9–57.6% for each variables.

<sup>c</sup>Assessment period for baseline comorbidities was extended to include any time before the index date.



**eFigure 2. Flowchart of study participants selection**

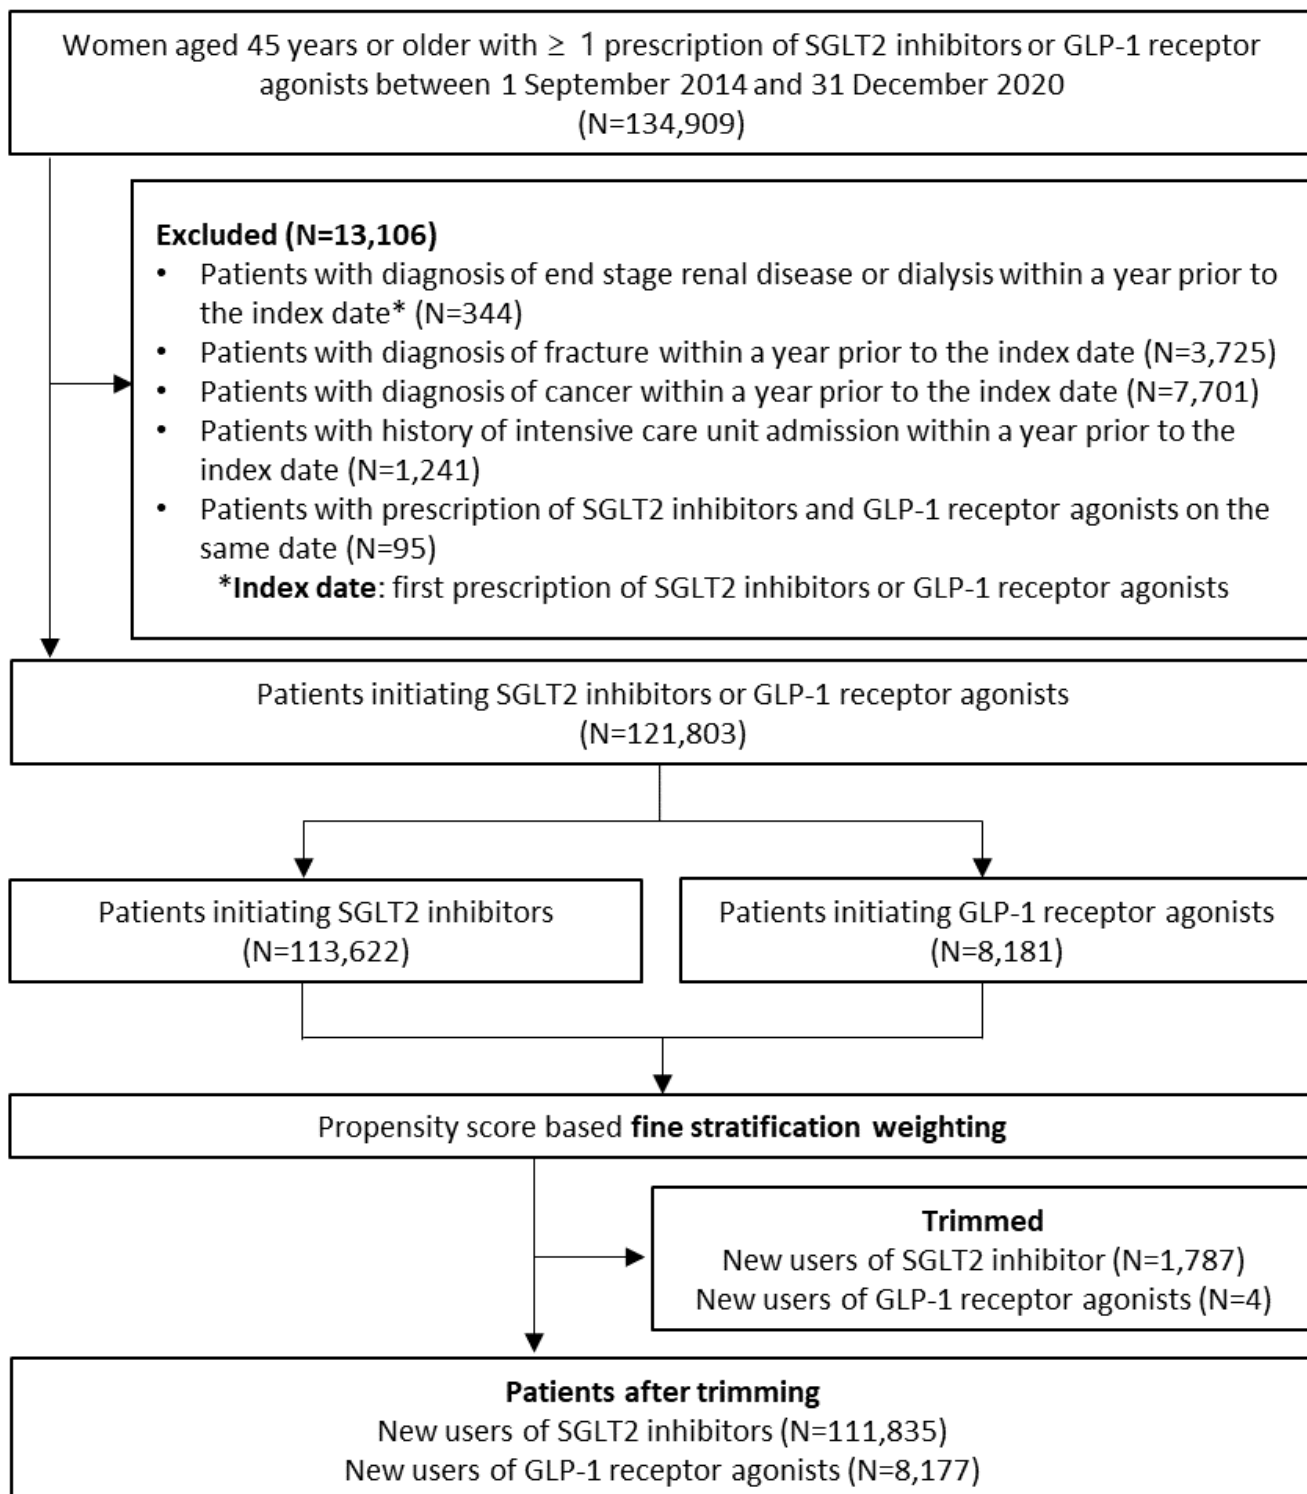

**Abbreviations:** GLP-1, glucagon like peptide 1; SGLT2, sodium glucose cotransporter 2

**eTable 5. Association between the use of SGLT2 inhibitors and the risk of fractures compared with the use of GLP-1 receptor agonists.**

| Outcome                   | SGLT2 inhibitors |              |                                      | GLP-1 receptor agonists |              |                                      | Weighted HR<br>(95% CI) |
|---------------------------|------------------|--------------|--------------------------------------|-------------------------|--------------|--------------------------------------|-------------------------|
|                           | Events           | Person-years | Weighted IR <sup>a</sup><br>(95% CI) | Events                  | Person-years | Weighted IR <sup>a</sup><br>(95% CI) |                         |
| <b>Primary outcome</b>    |                  |              |                                      |                         |              |                                      |                         |
| Overall fractures         | 2,723            | 164,967      | 1.67 (1.60-1.73)                     | 156                     | 6,737        | 1.92 (1.59-2.30)                     | 0.92 (0.68-1.24)        |
| <b>Secondary outcomes</b> |                  |              |                                      |                         |              |                                      |                         |
| Vertebral fractures       | 1,383            | 166,612      | 0.84 (0.80-0.88)                     | 66                      | 6,802        | 0.85 (0.64-1.12)                     | 1.06 (0.67-1.69)        |
| Hip fractures             | 325              | 167,928      | 0.20 (0.18-0.22)                     | 39                      | 6,822        | 0.38 (0.25-0.57)                     | 0.56 (0.34-0.91)        |
| Humerus fractures         | 280              | 167,839      | 0.17 (0.15-0.19)                     | 26                      | 6,819        | 0.21 (0.11-0.36)                     | 0.79 (0.43-1.45)        |
| Distal radius fractures   | 848              | 167,036      | 0.51 (0.48-0.55)                     | 34                      | 6,808        | 0.48 (0.33-0.69)                     | 1.07 (0.54-2.11)        |

**Abbreviations:** CI, confidence interval; GLP-1, glucagon like peptide 1; HR, hazard ratio; IR, incidence rate; SGLT2, sodium glucose cotransporter 2

<sup>a</sup>per 100 person-years

**eTable 6. Results of subgroup analyses with events, person-years, weighted IRs (per 100 person-years), weighted HRs with 95% CIs, and p for interaction for the association between the use of SGLT2 inhibitors vs. GLP-1 receptor agonists and the risk of overall fractures.**

| Stratification                     | SGLT2 inhibitors |              |                                   | GLP-1 receptor agonists |              |                                   | Weighted HR (95% CI) | P for interaction |
|------------------------------------|------------------|--------------|-----------------------------------|-------------------------|--------------|-----------------------------------|----------------------|-------------------|
|                                    | Events           | Person-years | Weighted IR <sup>a</sup> (95% CI) | Events                  | Person-years | Weighted IR <sup>a</sup> (95% CI) |                      |                   |
| <b>Age group</b>                   |                  |              |                                   |                         |              |                                   |                      |                   |
| 45-60                              | 728              | 92,473       | 0.79 (0.73-0.85)                  | 21                      | 3,448        | 0.71 (0.45-1.08)                  | 1.12 (0.59-2.10)     |                   |
| 61-75                              | 1,359            | 60,789       | 2.24 (2.12-2.37)                  | 80                      | 2,588        | 2.67 (2.05-3.42)                  | 0.86 (0.58-1.28)     | 0.2317            |
| >75                                | 636              | 11,705       | 5.39 (4.96-5.86)                  | 55                      | 701          | 6.42 (4.59-8.74)                  | 0.87 (0.57-1.33)     | 0.3390            |
| <b>Diagnosis of osteoporosis</b>   |                  |              |                                   |                         |              |                                   |                      |                   |
| Yes                                | 441              | 12,628       | 3.62 (3.26-4.01)                  | 25                      | 560          | 2.39 (1.27-4.08)                  | 1.52 (0.89-2.60)     | <b>0.0064</b>     |
| No                                 | 2,282            | 152,339      | 1.52 (1.45-1.58)                  | 131                     | 6,178        | 1.87 (1.53-2.26)                  | 0.85 (0.63-1.15)     |                   |
| <b>Osteoporosis medication use</b> |                  |              |                                   |                         |              |                                   |                      |                   |
| Yes                                | 563              | 18,924       | 3.00 (2.75-3.26)                  | 42                      | 939          | 3.14 (2.05-4.61)                  | 0.98 (0.63-1.52)     | 0.6910            |
| No                                 | 2,160            | 146,042      | 1.50 (1.43-1.56)                  | 114                     | 5,798        | 1.84 (1.49-2.24)                  | 0.85 (0.61-1.20)     |                   |
| <b>Diagnosis of osteoarthritis</b> |                  |              |                                   |                         |              |                                   |                      |                   |
| Yes                                | 1,242            | 54,309       | 2.31 (2.18-2.45)                  | 64                      | 2,315        | 1.85 (1.31-2.53)                  | 1.34 (0.93-1.93)     | <b>0.0280</b>     |
| No                                 | 1,481            | 110,658      | 1.35 (1.28-1.42)                  | 92                      | 4,423        | 1.98 (1.57-2.47)                  | 0.71 (0.49-1.04)     |                   |
| <b>Neurological dysfunction</b>    |                  |              |                                   |                         |              |                                   |                      |                   |
| <b>Yes</b>                         | 373              | 9,432        | 4.07 (3.65-4.54)                  | 39                      | 594          | 5.00 (3.32-7.23)                  | 0.84 (0.50-1.39)     | 0.5315            |
| <b>No</b>                          | 2,350            | 155,535      | 1.52 (1.46-1.59)                  | 117                     | 6,144        | 1.62 (1.30-1.99)                  | 0.99 (0.73-1.36)     |                   |
| <b>Thiazolidinediones use</b>      |                  |              |                                   |                         |              |                                   |                      |                   |
| Yes                                | 459              | 22,731       | 2.01 (1.82-2.21)                  | 33                      | 1,331        | 2.06 (1.37-2.98)                  | 1.06 (0.65-1.73)     | 0.9328            |
| No                                 | 2,264            | 142,236      | 1.61 (1.54-1.67)                  | 123                     | 5,407        | 1.84 (1.48-2.27)                  | 0.91 (0.65-1.28)     |                   |
| <b>Proton-Pump Inhibitor use</b>   |                  |              |                                   |                         |              |                                   |                      |                   |
| Yes                                | 1,257            | 62,996       | 2.01 (1.90-2.13)                  | 85                      | 2,920        | 2.30 (1.75-2.96)                  | 0.92 (0.66-1.27)     | 0.9528            |
| No                                 | 1,466            | 101,971      | 1.46 (1.38-1.53)                  | 71                      | 3,817        | 1.69 (1.29-2.17)                  | 0.91 (0.51-1.61)     |                   |
| <b>Oral corticosteroids use</b>    |                  |              |                                   |                         |              |                                   |                      |                   |
| Yes                                | 1,094            | 61,260       | 1.81 (1.70-1.92)                  | 61                      | 2,304        | 2.19 (1.58-2.95)                  | 0.87 (0.57-1.33)     | 0.8003            |
| No                                 | 1,629            | 103,707      | 1.59 (1.51-1.67)                  | 95                      | 4,433        | 1.70 (1.33-2.15)                  | 0.99 (0.68-1.45)     |                   |
| <b>SSRIs use</b>                   |                  |              |                                   |                         |              |                                   |                      |                   |
| Yes                                | 77               | 3,548        | 1.98 (1.46-2.62)                  | 5                       | 190          | 3.74 (1.51-7.71)                  | 0.53 (0.16-1.72)     | 0.2345            |
| No                                 | 2,646            | 161,419      | 1.66 (1.59-1.72)                  | 151                     | 6,548        | 1.96 (1.62-2.35)                  | 0.89 (0.65-1.21)     |                   |
| <b>Fall-related medication use</b> |                  |              |                                   |                         |              |                                   |                      |                   |
| Yes                                | 2,652            | 155,910      | 1.72 (1.65-1.79)                  | 151                     | 6,443        | 2.04 (1.69-2.44)                  | 0.89 (0.64-1.23)     | 0.8225            |
| No                                 | 71               | 9,056        | 0.81 (0.62-1.05)                  | 5                       | 294          | 1.47 (0.40-3.77)                  | 0.57 (0.17-1.89)     |                   |
| <b>Type of SGLT2 inhibitors</b>    |                  |              |                                   |                         |              |                                   |                      |                   |
| Dapagliflozin                      | 1,664            | 103,612      | 1.62 (1.55-1.71)                  | 156                     | 6,737        | 1.85 (1.53-2.23)                  | 0.93 (0.68-1.27)     |                   |
| Empagliflozin                      | 919              | 52,185       | 1.76 (1.65-1.88)                  | 156                     | 6,737        | 1.98 (1.64-2.37)                  | 0.95 (0.71-1.26)     |                   |
| Ipragliflozin                      | 15               | 1,120        | 1.34 (0.75-2.21)                  | 156                     | 6,737        | 2.00 (1.51-2.59)                  | 0.76 (0.30-1.91)     |                   |

|               |     |       |                  |     |       |                  |                  |
|---------------|-----|-------|------------------|-----|-------|------------------|------------------|
| Ertugliflozin | 125 | 8,050 | 1.56 (1.30-1.87) | 156 | 6,737 | 1.76 (1.44-2.12) | 0.92 (0.56-1.51) |
|---------------|-----|-------|------------------|-----|-------|------------------|------------------|

---

**Abbreviations:** CI, confidence interval; GLP-1, glucagon like peptide 1; HR, hazard ratio; IR, incidence rate; SGLT2, sodium glucose cotransporter 2; SSRIs, selective serotonin receptor inhibitors.  
\*per 100 person-years

**eTable 7. Results of sensitivity analyses with events, person-years, weighted IRs (per 100 person-years), weighted HRs and 95% CIs for the association between the use of SGLT2 inhibitors vs. GLP-1 receptor agonists and the risk of overall fractures.**

| Analyses                                          | SGLT2 inhibitors |              |                                   | GLP-1 receptor agonists |              |                                   | Weighted HR (95% CI) |
|---------------------------------------------------|------------------|--------------|-----------------------------------|-------------------------|--------------|-----------------------------------|----------------------|
|                                                   | Events           | Person-years | Weighted IR <sup>a</sup> (95% CI) | Events                  | Person-years | Weighted IR <sup>a</sup> (95% CI) |                      |
| History of surgical menopause                     | 19               | 2,190        | 0.61 (0.24-1.26)                  | 0                       | 113          | -                                 | -                    |
| Hormone replacement therapy                       | 82               | 9,438        | 0.89 (0.70-1.12)                  | 4                       | 391          | 3.74 (1.99-6.39)                  | 0.23 (0.05-1.08)     |
| Laboratory results included analysis <sup>b</sup> | 2,723            | 164,967      | 1.56 (1.48-1.65)                  | 156                     | 6,737        | 1.77 (1.30-2.34)                  | 0.92 (0.56-1.51)     |
| Extended look-back period <sup>c</sup>            | 2,723            | 164,967      | 1.66 (1.60-1.72)                  | 156                     | 6,737        | 1.88 (1.55-2.25)                  | 0.94 (0.69-1.28)     |
| Varying grace period                              |                  |              |                                   |                         |              |                                   |                      |
| 30-day                                            | 2,194            | 136,530      | 1.62 (1.55-1.69)                  | 45                      | 1,809        | 1.97 (1.38-2.73)                  | 0.95 (0.54-1.66)     |
| 60-day                                            | 2,529            | 155,009      | 1.64 (1.58-1.71)                  | 106                     | 4,777        | 1.99 (1.60-2.44)                  | 0.88 (0.62-1.27)     |
| Stringent outcome definition                      | 1,004            | 123,287      | 0.82 (0.77-0.87)                  | 63                      | 4,800        | 1.29 (0.97-1.68)                  | 0.69 (0.47-1.01)     |
| Control outcomes                                  |                  |              |                                   |                         |              |                                   |                      |
| Herpes zoster virus infection                     | 5,015            | 158,727      | 3.18 (3.09-3.27)                  | 220                     | 6,564        | 3.01 (2.58-3.48)                  | 1.08 (0.86-1.35)     |
| Hospitalization for heart failure                 | 343              | 164,154      | 0.21 (0.19-0.24)                  | 27                      | 6,709        | 0.23 (0.13-0.38)                  | 1.13 (0.66-1.95)     |

**Abbreviations:** CI, confidence interval; GLP-1, glucagon like peptide 1; HR, hazard ratio; IR, incidence rate; SGLT2, sodium glucose cotransporter 2; SSRIs, selective serotonin receptor inhibitors  
<sup>a</sup>per 100 person-years

<sup>b</sup>Laboratory test results were assessed within 3 years prior to the index date and the most recent value was included. Included lab variables comprised waist circumference, body mass index, fasting blood glucose, systolic blood pressure, diastolic blood pressure, total cholesterol, low density lipoprotein cholesterol, high density lipoprotein cholesterol, triglycerides, serum creatinine, estimated glomerular filtration rate, aspartate aminotransferase level, alanine aminotransferase level, gamma glutamyl transferase level, and smoking behavior, which presented varying missing rates of 27.9~60.5% for each variables.

<sup>c</sup>Assessment period for baseline comorbidities was extended to include any time before the index date.

**eTable 8. Reasons for the end of follow-up among weighted populations received SGLT2 inhibitors or DPP4 inhibitors.**

| Reasons                                      | SGLT2 inhibitors<br>(n=37,530) | DPP4 inhibitors<br>(n=332,004) |
|----------------------------------------------|--------------------------------|--------------------------------|
| Follow-up, median (IQR), years               | 0.91 (0.35-2.15)               | 1.52 (0.49-3.42)               |
| Follow-up, mean (SD), years                  | 1.45 (1.42)                    | 2.09 (1.79)                    |
| Outcome occurrence, n (%)                    | 768 (2.05 %)                   | 18,794 (5.66%)                 |
| Drug discontinuation, n (%)                  | 9,610 (25.61 %)                | 110,836 (33.38%)               |
| Drug switch/add-on to comparator drug, n (%) | 9,385 (25.01 %)                | 24,079 (7.25%)                 |
| Death, n (%)                                 | 171 (0.46 %)                   | 8,317 (2.51%)                  |
| End of the study period, n (%)               | 17,596 (46.89 %)               | 169,978 (51.20%)               |

**Abbreviations:** DPP4, dipeptidyl peptidase 4; IQR, interquartile range; SD, standard deviation; SGLT2, sodium glucose cotransporter 2

**eTable 9. Reasons for the end of follow-up among weighted populations received SGLT2 inhibitors or GLP-1 receptor agonists.**

| Reasons                                      | SGLT2 inhibitors<br>(n=111,835) | GLP-1 receptor agonists<br>(n=8,177) |
|----------------------------------------------|---------------------------------|--------------------------------------|
| Follow-up, median (IQR), years               | 0.92 (0.41-2.06)                | 0.48 (0.25-1.05)                     |
| Follow-up, mean (SD), years                  | 1.43 (1.33)                     | 0.82 (0.85)                          |
| Outcome occurrence, n (%)                    | 2,673 (2.39 %)                  | 156 (1.91 %)                         |
| Drug discontinuation, n (%)                  | 55,126 (49.29 %)                | 5,373 (65.71 %)                      |
| Drug switch/add-on to comparator drug, n (%) | 2,165 (1.94 %)                  | 576 (7.04 %)                         |
| Death, n (%)                                 | 665 (0.59 %)                    | 48 (0.59 %)                          |
| End of the study period, n (%)               | 51,206 (45.79 %)                | 2,024 (24.75 %)                      |

**Abbreviations:** GLP-1, glucagon like peptide 1; IQR, interquartile range; SD, standard deviation; SGLT2, sodium glucose cotransporter 2

**eTable 10. Laboratory test results and missing rates of patients receiving SGLT2 inhibitors or comparator drugs before propensity score based fine stratification.**

| Baseline characteristics <sup>a</sup>        | SGLT2i vs. DPP4i     |                      |       | SGLT2i vs. GLP1RA     |                     |       |
|----------------------------------------------|----------------------|----------------------|-------|-----------------------|---------------------|-------|
|                                              | SGLT2i<br>(n=37,532) | DPP4i<br>(n=332,038) | ASD   | SGLT2i<br>(n=113,622) | GLP1RA<br>(n=8,181) | ASD   |
| <b>Laboratory test results, mean (SD)</b>    |                      |                      |       |                       |                     |       |
| Waist circumference [cm]                     | 87.2 (9.5)           | 84.4 (9.6)           | 0.293 | 86.5 (9.6)            | 86.7 (10.4)         | 0.021 |
| Missing; n (%)                               | 10480 (27.9)         | 113017 (34)          | 0.133 | 32025 (28.2)          | 2541 (31.1)         | 0.063 |
| Body mass index [kg/m <sup>2</sup> ]         | 27.4 (4.1)           | 25.7 (6.3)           | 0.321 | 26.8 (4)              | 26.5 (4.5)          | 0.087 |
| Missing; n (%)                               | 10481 (27.9)         | 113058 (34)          | 0.133 | 32027 (28.2)          | 2541 (31.1)         | 0.063 |
| Fasting blood glucose [mg/dL]                | 142.4 (47.6)         | 143.6 (49.4)         | 0.024 | 151.3 (52.4)          | 163.1 (61.8)        | 0.207 |
| Missing; n (%)                               | 10616 (28.3)         | 114626 (34.5)        | 0.135 | 32642 (28.7)          | 2620 (32)           | 0.072 |
| Systolic blood pressure [mmHg]               | 129.4 (15.5)         | 129.4 (15.7)         | 0.002 | 128.5 (15.4)          | 127.5 (16)          | 0.063 |
| Missing; n (%)                               | 10615 (28.3)         | 114599 (34.5)        | 0.135 | 32634 (28.7)          | 2617 (32)           | 0.071 |
| Diastolic blood pressure [mmHg]              | 78.3 (10)            | 77.5 (9.9)           | 0.086 | 77.2 (9.8)            | 75.4 (10)           | 0.185 |
| Missing; n (%)                               | 10615 (28.3)         | 114599 (34.5)        | 0.135 | 32634 (28.7)          | 2617 (32)           | 0.071 |
| Total cholesterol. [mg/dL]                   | 199.8 (52.7)         | 197.3 (49)           | 0.049 | 187.3 (50.3)          | 174.3 (44.8)        | 0.273 |
| Missing; n (%)                               | 16808 (44.8)         | 149130 (44.9)        | 0.003 | 50282 (44.3)          | 3874 (47.4)         | 0.062 |
| Low density lipoprotein cholesterol [mg/dL]  | 114.4 (49.2)         | 112.9 (44.1)         | 0.032 | 103.7 (45.5)          | 92.8 (38.9)         | 0.258 |
| Missing; n (%)                               | 17059 (45.5)         | 150512 (45.3)        | 0.002 | 50897 (44.8)          | 3916 (47.9)         | 0.062 |
| High density lipoprotein cholesterol [mg/dL] | 53.7 (14.5)          | 53.5 (16.9)          | 0.012 | 52.6 (13.7)           | 51.3 (12.8)         | 0.102 |
| Missing; n (%)                               | 16808 (44.8)         | 149130 (44.9)        | 0.003 | 50282 (44.3)          | 3874 (47.4)         | 0.062 |
| Triglycerides [mg/dL]                        | 164.5 (112.5)        | 158.4 (106.4)        | 0.055 | 159.6 (110.6)         | 157.1 (127.2)       | 0.02  |
| Missing; n (%)                               | 16808 (44.8)         | 149130 (44.9)        | 0.003 | 50282 (44.3)          | 3874 (47.4)         | 0.062 |
| Serum creatinine [mg/dL]                     | 0.8 (0.6)            | 0.8 (0.5)            | 0.051 | 0.8 (0.6)             | 0.8 (0.3)           | 0.099 |
| Missing; n (%)                               | 10615 (28.3)         | 114630 (34.5)        | 0.135 | 32641 (28.7)          | 2620 (32)           | 0.072 |
| eGFR [mL/min/1.73m <sup>2</sup> ]            | 88.4 (25.7)          | 84.6 (26.7)          | 0.148 | 87.8 (26.4)           | 84.8 (31.1)         | 0.102 |
| Missing; n (%)                               | 21629 (57.6)         | 176777 (53.2)        | 0.088 | 64070 (56.4)          | 4953 (60.5)         | 0.084 |
| AST (SGOT) [IU/L]                            | 32.2 (24.8)          | 29.7 (25.4)          | 0.098 | 31.3 (24.1)           | 29.9 (21.4)         | 0.06  |
| Missing; n (%)                               | 10615 (28.3)         | 114628 (34.5)        | 0.135 | 32641 (28.7)          | 2620 (32)           | 0.072 |
| ALT (SGPT) [IU/L]                            | 35.2 (29.6)          | 30.5 (28.9)          | 0.16  | 33.3 (28.8)           | 30.3 (23.7)         | 0.111 |
| Missing; n (%)                               | 10615 (28.3)         | 114633 (34.5)        | 0.135 | 32642 (28.7)          | 2620 (32)           | 0.072 |
| GGT [IU/L]                                   | 41.8 (44.3)          | 37.3 (46.8)          | 0.097 | 39.5 (44.3)           | 36.8 (40.7)         | 0.065 |
| Missing; n (%)                               | 10615 (28.3)         | 114628 (34.5)        | 0.135 | 32641 (28.7)          | 2620 (32)           | 0.072 |
| <b>Lifestyle risk factors, n (%)</b>         |                      |                      |       |                       |                     |       |
| Smoking                                      | 771 (2.8)            | 5814 (2.7)           | 0.012 | 2344 (2.9)            | 179 (3.2)           | 0.018 |
| Missing; n (%)                               | 10477 (27.9)         | 112961 (34)          | 0.132 | 32014 (28.2)          | 2539 (31)           | 0.063 |

**Abbreviations:** ASD, absolute standardized difference; AST, aspartate aminotransferase; ALT, alanine aminotransferase; DPP4i, dipeptidyl peptidase 4 inhibitors; eGFR, estimated glomerular filtration rate; GGT, gamma glutamyl transferase; GLP1RA, glucagon like peptide 1 receptor agonists; SD, standard deviation; SGLT2i, sodium glucose cotransporter 2 inhibitors; SGOT, serum glutamic oxaloacetic transaminase; SGPT, serum glutamic pyruvate transaminase.

<sup>a</sup>Baseline characteristics were assessed within 3 years prior to the index date and the most recent value was included.



**eTable 11. Baseline characteristics after weighting by propensity score stratification in patients receiving SGLT2 inhibitors or comparator drugs with bone mineral density test results present.**

| Baseline characteristics                          | Patients, No. (%)   |                    |        |                     |                   |       |
|---------------------------------------------------|---------------------|--------------------|--------|---------------------|-------------------|-------|
|                                                   | SGLT2i vs. DPP4i    |                    |        | SGLT2i vs. GLP1RA   |                   |       |
|                                                   | SGLT2i<br>(n=1,257) | DPP4i<br>(n=6,103) | ASD    | SGLT2i<br>(n=2,514) | GLP1RA<br>(n=250) | ASD   |
| <b>Cohort entry year</b>                          |                     |                    |        |                     |                   |       |
| 2018                                              | 160 (12.7)          | 771 (12.6)         | 0.003  | 332 (13.2)          | 27 (10.7)         | 0.078 |
| 2019                                              | 496 (39.5)          | 2416 (39.6)        | 0.003  | 1031 (41)           | 98 (39.4)         | 0.033 |
| 2020                                              | 601 (47.8)          | 2917 (47.8)        | <0.001 | 1151 (45.8)         | 125 (49.9)        | 0.083 |
| <b>Age, mean (SD), y</b>                          | 60.1 (6)            | 60.1 (6)           | <0.001 | 61 (6.1)            | 61.1 (6)          | 0.012 |
| <b>Age group</b>                                  |                     |                    | 0.001  |                     |                   | 0.008 |
| 45-65                                             | 682 (54.3)          | 3315 (54.3)        |        | 1210 (48.1)         | 121 (48.5)        |       |
| >65                                               | 575 (45.7)          | 2788 (45.7)        |        | 1304 (51.9)         | 129 (51.5)        |       |
| <b>Diabetic medications</b>                       |                     |                    |        |                     |                   |       |
| Alpha-glucosidase inhibitors                      | 14 (1.1)            | 65 (1.1)           | 0.004  | 36 (1.4)            | 13 (5)            | 0.204 |
| GLP1 RAs                                          | 2 (0.2)             | 9 (0.1)            | 0.004  |                     |                   |       |
| DPP4 inhibitors                                   |                     |                    |        | 1786 (71)           | 179 (71.4)        | 0.009 |
| Insulin                                           | 48 (3.8)            | 234 (3.8)          | 0.001  | 340 (13.5)          | 37 (15)           | 0.042 |
| Meglitinides                                      | 2 (0.2)             | 9 (0.1)            | 0.005  | 7 (0.3)             | 0 (0.1)           | 0.046 |
| Metformin                                         | 632 (50.3)          | 3061 (50.2)        | 0.002  | 2148 (85.4)         | 220 (87.9)        | 0.074 |
| Sulfonylureas                                     | 178 (14.2)          | 860 (14.1)         | 0.002  | 1226 (48.8)         | 124 (49.6)        | 0.016 |
| Thiazolidinediones                                | 56 (4.5)            | 276 (4.5)          | 0.003  | 380 (15.1)          | 48 (19.3)         | 0.11  |
| <b>Number of diabetic medications being taken</b> |                     |                    |        |                     |                   |       |
| 0-1                                               | 1044 (83.1)         | 5075 (83.1)        | 0.003  | 466 (18.5)          | 45 (18.1)         | 0.011 |
| 2-3                                               | 210 (16.7)          | 1014 (16.6)        | 0.002  | 1791 (71.2)         | 166 (66.5)        | 0.102 |
| 4+                                                | 3 (0.2)             | 14 (0.2)           | 0.001  | 257 (10.2)          | 38 (15.4)         | 0.155 |
| <b>Level of diabetes treatment</b>                |                     |                    |        |                     |                   |       |
| 1                                                 | 1032 (82.1)         | 5013 (82.1)        | 0.001  | 453 (18)            | 44 (17.6)         | 0.01  |
| 2                                                 | 177 (14.1)          | 855 (14)           | 0.002  | 1721 (68.5)         | 168 (67.4)        | 0.023 |
| 3                                                 | 48 (3.8)            | 234 (3.8)          | 0.001  | 340 (13.5)          | 37 (15)           | 0.042 |
| <b>Diabetes related conditions</b>                |                     |                    |        |                     |                   |       |
| Diabetic nephropathy                              | 29 (2.3)            | 145 (2.4)          | 0.005  | 133 (5.3)           | 11 (4.3)          | 0.045 |
| Diabetic neuropathy                               | 117 (9.3)           | 582 (9.5)          | 0.008  | 476 (18.9)          | 49 (19.4)         | 0.012 |
| Diabetic retinopathy                              | 162 (12.9)          | 793 (13)           | 0.003  | 666 (26.5)          | 58 (23.1)         | 0.08  |
| Hypoglycaemia                                     | 3 (0.2)             | 12 (0.2)           | 0.009  | 6 (0.2)             | 0 (0.1)           | 0.039 |
| <b>Charlson Comorbidity Index</b>                 |                     |                    |        |                     |                   |       |
| 0                                                 | 680 (54.1)          | 3286 (53.8)        | 0.005  | 1136 (45.2)         | 92 (36.9)         | 0.17  |
| 1                                                 | 306 (24.3)          | 1485 (24.3)        | <0.001 | 899 (35.8)          | 105 (42)          | 0.128 |
| 2                                                 | 170 (13.5)          | 834 (13.7)         | 0.004  | 256 (10.2)          | 32 (12.7)         | 0.08  |
| ≥3                                                | 101 (8)             | 498 (8.2)          | 0.005  | 223 (8.9)           | 21 (8.4)          | 0.016 |
| <b>Number of outpatients visits</b>               |                     |                    |        |                     |                   |       |
| 0-2                                               | 22 (1.8)            | 107 (1.8)          | <0.001 | 0 (0)               | 0 (0)             |       |
| 3-5                                               | 57 (4.5)            | 285 (4.7)          | 0.007  | 57 (2.3)            | 3 (1.2)           | 0.085 |
| 6+                                                | 1178 (93.7)         | 5711 (93.6)        | 0.006  | 2457 (97.7)         | 247 (98.8)        | 0.085 |
| <b>Number of hospitalizations</b>                 |                     |                    |        |                     |                   |       |
| 0                                                 | 1011 (80.4)         | 4907 (80.4)        | 0.001  | 1919 (76.3)         | 175 (70.1)        | 0.142 |
| 1-2                                               | 223 (17.7)          | 1080 (17.7)        | 0.001  | 527 (21)            | 63 (25.2)         | 0.101 |
| 3+                                                | 23 (1.8)            | 116 (1.9)          | 0.005  | 68 (2.7)            | 12 (4.7)          | 0.106 |
| <b>Comorbidities</b>                              |                     |                    |        |                     |                   |       |
| Asthma                                            | 107 (8.5)           | 528 (8.6)          | 0.005  | 186 (7.4)           | 22 (8.8)          | 0.05  |
| Chronic kidney disease                            | 14 (1.1)            | 73 (1.2)           | 0.007  | 26 (1)              | 1 (0.3)           | 0.096 |
| Congestive heart failure                          | 30 (2.4)            | 162 (2.7)          | 0.017  | 57 (2.3)            | 5 (1.8)           | 0.03  |
| COPD                                              | 90 (7.2)            | 419 (6.9)          | 0.012  | 135 (5.4)           | 17 (6.8)          | 0.059 |
| Dementia                                          | 19 (1.5)            | 88 (1.4)           | 0.006  | 41 (1.6)            | 8 (3.3)           | 0.105 |

|                                                       |                             |                            |            |                             |                           |            |
|-------------------------------------------------------|-----------------------------|----------------------------|------------|-----------------------------|---------------------------|------------|
| Epilepsy                                              | 3 (0.2)                     | 15 (0.2)                   | <0.001     | 11 (0.4)                    | 1 (0.2)                   | 0.033      |
| Gout                                                  | 13 (1)                      | 62 (1)                     | 0.001      | 23 (0.9)                    | 1 (0.5)                   | 0.05       |
| Hyperlipidemia                                        | 651 (51.8)                  | 3157 (51.7)                | 0.001      | 1357 (54)                   | 126 (50.4)                | 0.071      |
| <b>Patients, No. (%)</b>                              |                             |                            |            |                             |                           |            |
|                                                       | <b>SGLT2i vs. DPP4i</b>     |                            |            | <b>SGLT2i vs. GLP1RA</b>    |                           |            |
| <b>Baseline characteristics</b>                       | <b>SGLT2i<br/>(n=1,257)</b> | <b>DPP4i<br/>(n=6,103)</b> | <b>ASD</b> | <b>SGLT2i<br/>(n=2,514)</b> | <b>GLP1RA<br/>(n=250)</b> | <b>ASD</b> |
| Hypertension                                          | 657 (52.3)                  | 3169 (51.9)                | 0.007      | 1298 (51.6)                 | 111 (44.5)                | 0.143      |
| Ischemic heart disease                                | 87 (6.9)                    | 427 (7)                    | 0.003      | 197 (7.8)                   | 20 (8)                    | 0.008      |
| Liver cirrhosis                                       | 4 (0.3)                     | 18 (0.3)                   | 0.005      | 20 (0.8)                    | 4 (1.5)                   | 0.066      |
| Osteoarthritis                                        | 477 (37.9)                  | 2313 (37.9)                | 0.001      | 960 (38.2)                  | 102 (40.9)                | 0.055      |
| Osteoporosis                                          | 161 (12.8)                  | 775 (12.7)                 | 0.003      | 325 (12.9)                  | 43 (17.2)                 | 0.12       |
| Parkinson's disease                                   | 4 (0.3)                     | 19 (0.3)                   | 0.001      | 0 (0)                       | 0 (0)                     |            |
| Rheumatoid arthritis                                  | 23 (1.8)                    | 108 (1.8)                  | 0.005      | 53 (2.1)                    | 4 (1.8)                   | 0.024      |
| Stroke                                                | 21 (1.7)                    | 97 (1.6)                   | 0.006      | 60 (2.4)                    | 5 (2.1)                   | 0.023      |
| Thyroid disease                                       | 81 (6.4)                    | 394 (6.5)                  | 0.001      | 188 (7.5)                   | 24 (9.5)                  | 0.074      |
| <b>Fall related medications</b>                       |                             |                            |            |                             |                           |            |
| ACE inhibitors or ARBs                                | 603 (48)                    | 2917 (47.8)                | 0.004      | 1315 (52.3)                 | 120 (48.1)                | 0.085      |
| Anticholinergics                                      | 1036 (82.4)                 | 5035 (82.5)                | 0.002      | 2105 (83.7)                 | 223 (89.3)                | 0.164      |
| Benzodiazepines                                       | 478 (38)                    | 2341 (38.4)                | 0.007      | 1029 (40.9)                 | 112 (44.7)                | 0.076      |
| beta-blockers                                         | 54 (4.3)                    | 262 (4.3)                  | <0.001     | 118 (4.7)                   | 14 (5.4)                  | 0.033      |
| Calcium channel blockers                              | 438 (34.8)                  | 2097 (34.4)                | 0.01       | 888 (35.3)                  | 80 (32.2)                 | 0.066      |
| Diuretics                                             | 271 (21.6)                  | 1302 (21.3)                | 0.005      | 494 (19.6)                  | 44 (17.4)                 | 0.057      |
| Nitrates                                              | 10 (0.8)                    | 51 (0.8)                   | 0.004      | 32 (1.3)                    | 2 (0.7)                   | 0.055      |
| Opioids                                               | 117 (9.3)                   | 568 (9.3)                  | <0.001     | 300 (11.9)                  | 39 (15.5)                 | 0.103      |
| Sedative hypnotics                                    | 136 (10.8)                  | 679 (11.1)                 | 0.01       | 277 (11)                    | 25 (9.9)                  | 0.038      |
| Tricyclic antidepressant                              | 77 (6.1)                    | 375 (6.1)                  | 0.001      | 181 (7.2)                   | 30 (12)                   | 0.164      |
| Typical antipsychotics                                | 36 (2.9)                    | 175 (2.9)                  | <0.001     | 78 (3.1)                    | 16 (6.5)                  | 0.161      |
| <b>Osteoporosis medications</b>                       |                             |                            |            |                             |                           |            |
| Bisphosphonates                                       | 69 (5.5)                    | 332 (5.4)                  | 0.002      | 165 (6.6)                   | 18 (7.1)                  | 0.021      |
| Calcium/vitamin D                                     | 132 (10.5)                  | 661 (10.8)                 | 0.011      | 322 (12.8)                  | 26 (10.4)                 | 0.075      |
| Parathyroid hormone/calcitonin                        | 4 (0.3)                     | 21 (0.3)                   | 0.005      | 28 (1.1)                    | 9 (3.6)                   | 0.166      |
| RANKL inhibitors                                      | 12 (1)                      | 55 (0.9)                   | 0.006      |                             |                           |            |
| SERMs                                                 | 30 (2.4)                    | 147 (2.4)                  | 0.001      | 59 (2.3)                    | 2 (0.9)                   | 0.118      |
| <b>Comedications</b>                                  |                             |                            |            |                             |                           |            |
| Anticoagulants                                        | 37 (2.9)                    | 177 (2.9)                  | 0.003      | 86 (3.4)                    | 8 (3.1)                   | 0.018      |
| Anticonvulsants                                       | 168 (13.4)                  | 822 (13.5)                 | 0.003      | 455 (18.1)                  | 48 (19.2)                 | 0.029      |
| Antidepressants                                       | 111 (8.8)                   | 545 (8.9)                  | 0.004      | 188 (7.5)                   | 27 (10.8)                 | 0.117      |
| Aromatase inhibitors                                  |                             |                            |            |                             |                           |            |
| Oral corticosteroids                                  | 541 (43)                    | 2631 (43.1)                | 0.001      | 958 (38.1)                  | 128 (51.4)                | 0.27       |
| Hormone replacement therapy                           | 98 (7.8)                    | 471 (7.7)                  | 0.003      | 190 (7.6)                   | 20 (7.8)                  | 0.011      |
| Immunosuppressants                                    | 5 (0.4)                     | 23 (0.4)                   | 0.005      | 12 (0.5)                    | 0 (0.1)                   | 0.06       |
| NSAIDs                                                | 913 (72.6)                  | 4431 (72.6)                | 0.001      | 1855 (73.8)                 | 186 (74.4)                | 0.014      |
| Platelet inhibitors                                   | 672 (53.5)                  | 3272 (53.6)                | 0.003      | 1548 (61.6)                 | 151 (60.5)                | 0.021      |
| Proton-pump inhibitors                                | 622 (49.5)                  | 3019 (49.5)                | <0.001     | 1346 (53.5)                 | 154 (61.4)                | 0.16       |
| Statins                                               | 760 (60.5)                  | 3677 (60.2)                | 0.004      | 1954 (77.7)                 | 186 (74.4)                | 0.078      |
| <b>Laboratory test results<sup>a</sup>, mean (SD)</b> |                             |                            |            |                             |                           |            |
| Waist circumference [cm]                              | 87.2 (9.5)                  | 87.2 (10)                  | 0.002      | 86 (9.6)                    | 86.5 (9.7)                | 0.052      |
| Body mass index [kg/m <sup>2</sup> ]                  | 27.4 (3.9)                  | 27.4 (4.3)                 | 0.003      | 26.5 (3.9)                  | 27 (4.4)                  | 0.112      |
| Fasting blood glucose [mg/dL]                         | 145 (46.6)                  | 144.8 (45.7)               | 0.004      | 153.3 (51)                  | 151.8 (55.6)              | 0.028      |
| Systolic blood pressure [mmHg]                        | 130.1 (15.9)                | 130.1 (16)                 | 0.003      | 128.5 (15)                  | 128.6 (16)                | 0.01       |
| Diastolic blood pressure [mmHg]                       | 78.8 (10)                   | 78.8 (10.1)                | 0.003      | 76.5 (9.7)                  | 76.5 (9.5)                | 0.003      |
| Serum creatinine [mg/dL]                              | 0.7 (0.2)                   | 0.7 (0.2)                  | 0.008      | 0.7 (0.2)                   | 0.7 (0.2)                 | 0.004      |
| AST (SGOT) [IU/L]                                     | 34.7 (25.2)                 | 34.6 (23.6)                | 0.005      | 31.3 (19.2)                 | 30.9 (17.9)               | 0.022      |
| ALT (SGPT) [IU/L]                                     | 39.3 (36.5)                 | 39 (31.6)                  | 0.008      | 32.5 (23.3)                 | 31.9 (22.9)               | 0.024      |
| GGT [IU/L]                                            | 45 (42.4)                   | 44.9 (48.5)                | 0.004      | 39.6 (42)                   | 40 (58.8)                 | 0.007      |
| <b>Bone mineral density test results<sup>b</sup></b>  |                             |                            |            |                             |                           |            |
| T-score $\geq$ -1.0                                   | 556 (44.2)                  | 2732 (44.8)                | 0.011      | 1032 (41.1)                 | 97 (38.8)                 | 0.047      |
| -2.5 < T-score < -1.0                                 | 500 (39.8)                  | 2408 (39.5)                | 0.006      | 1025 (40.8)                 | 105 (42)                  | 0.025      |
| T-score $\leq$ -2.5                                   | 201 (16)                    | 963 (15.8)                 | 0.006      | 457 (18.2)                  | 48 (19.2)                 | 0.027      |

**Abbreviations:** ASD, absolute standardized difference; AST, aspartate aminotransferase; ALT, alanine aminotransferase; DPP4i, dipeptidyl peptidase 4 inhibitors; GGT, gamma glutamyl transferase; GLP1RA, glucagon like peptide 1 receptor agonists; SD, standard deviation; SGLT2i, sodium glucose cotransporter 2 inhibitors; SGOT, serum glutamic oxaloacetic transaminase; SGPT, serum glutamic pyruvate transaminase.

<sup>a</sup>Laboratory test results were assessed within 3 years prior to the index date and the most recent value was included.

<sup>b</sup>Bone mineral density tests were conducted using DXA (dual-energy X-ray absorptiometry). The test results were assessed within 3 years prior to the index date and the most recent value was included.

**eTable 12. Baseline characteristics before weighting by propensity score stratification in patients receiving SGLT2 inhibitors or comparator drugs with bone mineral density test results present.**

| Baseline characteristics                          | Patients, No. (%)   |                    |        |                     |                     |       |
|---------------------------------------------------|---------------------|--------------------|--------|---------------------|---------------------|-------|
|                                                   | SGLT2i vs. DPP4i    |                    |        | SGLT2i vs. GLP1RA   |                     |       |
|                                                   | SGLT2i<br>(n=1,273) | DPP4i<br>(n=6,331) | ASD    | SGLT2i<br>(n=3,574) | GLP-1 RA<br>(n=269) | ASD   |
| <b>Cohort entry year</b>                          |                     |                    |        |                     |                     |       |
| 2018                                              | 164 (12.9)          | 1018 (16.1)        | 0.091  | 441 (12.3)          | 44 (16.4)           | 0.115 |
| 2019                                              | 499 (39.2)          | 2308 (36.5)        | 0.057  | 1436 (40.2)         | 119 (44.2)          | 0.082 |
| 2020                                              | 610 (47.9)          | 3005 (47.5)        | 0.009  | 1697 (47.5)         | 106 (39.4)          | 0.163 |
| <b>Age, mean (SD), y</b>                          | 60.2 (6)            | 61.7 (6)           | 0.246  | 60.9 (6.1)          | 61.6 (6)            | 0.11  |
| <b>Age group</b>                                  |                     |                    | 0.238  |                     |                     | 0.117 |
| 45-65                                             | 683 (53.7)          | 2649 (41.8)        |        | 1746 (48.6)         | 115 (42.8)          |       |
| >65                                               | 590 (46.3)          | 3682 (58.2)        |        | 1838 (51.4)         | 154 (57.2)          |       |
| <b>Diabetic medications</b>                       |                     |                    |        |                     |                     |       |
| Alpha-glucosidase inhibitors                      | 14 (1.1)            | 87 (1.4)           | 0.025  | 43 (1.2)            | 5 (1.9)             | 0.053 |
| GLP1 RAs                                          | 2 (0.2)             | 11 (0.2)           | 0.004  |                     |                     |       |
| DPP4 inhibitors                                   |                     |                    |        | 2052 (57.4)         | 220 (81.8)          | 0.549 |
| Insulin                                           | 49 (3.8)            | 249 (3.9)          | 0.004  | 367 (10.3)          | 125 (46.5)          | 0.877 |
| Meglitinides                                      | 2 (0.2)             | 14 (0.2)           | 0.015  | 7 (0.2)             | 1 (0.4)             | 0.033 |
| Metformin                                         | 638 (50.1)          | 3470 (54.8)        | 0.094  | 2759 (77.2)         | 238 (88.5)          | 0.303 |
| Sulfonylureas                                     | 180 (14.1)          | 969 (15.3)         | 0.033  | 1336 (37.4)         | 169 (62.8)          | 0.526 |
| Thiazolidinediones                                | 57 (4.5)            | 186 (2.9)          | 0.082  | 426 (11.9)          | 51 (19)             | 0.196 |
| <b>Number of diabetic medications being taken</b> |                     |                    |        |                     |                     |       |
| 0-1                                               | 1057 (83)           | 5233 (82.7)        | 0.01   | 1230 (34.4)         | 16 (5.9)            | 0.759 |
| 2-3                                               | 213 (16.7)          | 1082 (17.1)        | 0.01   | 2058 (57.6)         | 189 (70.3)          | 0.266 |
| 4+                                                | 3 (0.2)             | 16 (0.3)           | 0.003  | 286 (8)             | 64 (23.8)           | 0.442 |
| <b>Level of diabetes treatment</b>                |                     |                    |        |                     |                     |       |
| 1                                                 | 1045 (82.1)         | 5187 (81.9)        | 0.004  | 1216 (34)           | 11 (4.1)            | 0.824 |
| 2                                                 | 179 (14.1)          | 895 (14.1)         | 0.002  | 1991 (55.7)         | 133 (49.4)          | 0.126 |
| 3                                                 | 49 (3.8)            | 249 (3.9)          | 0.004  | 367 (10.3)          | 125 (46.5)          | 0.877 |
| <b>Diabetes related conditions</b>                |                     |                    |        |                     |                     |       |
| Diabetic nephropathy                              | 29 (2.3)            | 137 (2.2)          | 0.008  | 156 (4.4)           | 20 (7.4)            | 0.131 |
| Diabetic neuropathy                               | 121 (9.5)           | 671 (10.6)         | 0.036  | 593 (16.6)          | 77 (28.6)           | 0.291 |
| Diabetic retinopathy                              | 165 (13)            | 935 (14.8)         | 0.052  | 786 (22)            | 121 (45)            | 0.502 |
| Hypoglycaemia                                     | 3 (0.2)             | 10 (0.2)           | 0.018  | 7 (0.2)             | 1 (0.4)             | 0.033 |
| <b>Charlson Comorbidity Index</b>                 |                     |                    |        |                     |                     |       |
| 0                                                 | 686 (53.9)          | 3585 (56.6)        | 0.055  | 1688 (47.2)         | 91 (33.8)           | 0.276 |
| 1                                                 | 309 (24.3)          | 1545 (24.4)        | 0.003  | 1169 (32.7)         | 119 (44.2)          | 0.239 |
| 2                                                 | 173 (13.6)          | 775 (12.2)         | 0.04   | 403 (11.3)          | 25 (9.3)            | 0.065 |
| ≥3                                                | 105 (8.2)           | 426 (6.7)          | 0.058  | 314 (8.8)           | 34 (12.6)           | 0.125 |
| <b>Number of outpatients visits</b>               |                     |                    |        |                     |                     |       |
| 0-2                                               | 22 (1.7)            | 134 (2.1)          | 0.028  | 29 (0.8)            | 0 (0)               | 0.128 |
| 3-5                                               | 57 (4.5)            | 248 (3.9)          | 0.028  | 95 (2.7)            | 4 (1.5)             | 0.082 |
| 6+                                                | 1194 (93.8)         | 5949 (94)          | 0.007  | 3450 (96.5)         | 265 (98.5)          | 0.128 |
| <b>Number of hospitalizations</b>                 |                     |                    |        |                     |                     |       |
| 0                                                 | 1023 (80.4)         | 5088 (80.4)        | <0.001 | 2763 (77.3)         | 182 (67.7)          | 0.217 |
| 1-2                                               | 227 (17.8)          | 1127 (17.8)        | 0.001  | 717 (20.1)          | 76 (28.3)           | 0.192 |
| 3+                                                | 23 (1.8)            | 116 (1.8)          | 0.002  | 94 (2.6)            | 11 (4.1)            | 0.081 |
| <b>Comorbidities</b>                              |                     |                    |        |                     |                     |       |
| Asthma                                            | 109 (8.6)           | 453 (7.2)          | 0.052  | 288 (8.1)           | 15 (5.6)            | 0.099 |
| Chronic kidney disease                            | 14 (1.1)            | 31 (0.5)           | 0.069  | 43 (1.2)            | 5 (1.9)             | 0.053 |
| Congestive heart failure                          | 32 (2.5)            | 135 (2.1)          | 0.025  | 98 (2.7)            | 8 (3)               | 0.014 |
| COPD                                              | 91 (7.1)            | 354 (5.6)          | 0.064  | 235 (6.6)           | 11 (4.1)            | 0.111 |
| Dementia                                          | 20 (1.6)            | 141 (2.2)          | 0.048  | 58 (1.6)            | 10 (3.7)            | 0.13  |

|                                                       |                             |                            |            |                             |                             |            |
|-------------------------------------------------------|-----------------------------|----------------------------|------------|-----------------------------|-----------------------------|------------|
| Epilepsy                                              | 4 (0.3)                     | 29 (0.5)                   | 0.023      | 14 (0.4)                    | 2 (0.7)                     | 0.047      |
| Gout                                                  | 13 (1)                      | 70 (1.1)                   | 0.008      | 38 (1.1)                    | 3 (1.1)                     | 0.005      |
| Hyperlipidemia                                        | 659 (51.8)                  | 3145 (49.7)                | 0.042      | 1888 (52.8)                 | 142 (52.8)                  | 0.001      |
| <b>Patients, No. (%)</b>                              |                             |                            |            |                             |                             |            |
|                                                       | <b>SGLT2i vs. DPP4i</b>     |                            |            | <b>SGLT2i vs. GLP1RA</b>    |                             |            |
| <b>Baseline characteristics</b>                       | <b>SGLT2i<br/>(n=1,273)</b> | <b>DPP4i<br/>(n=6,331)</b> | <b>ASD</b> | <b>SGLT2i<br/>(n=3,574)</b> | <b>GLP-1 RA<br/>(n=269)</b> | <b>ASD</b> |
| Hypertension                                          | 669 (52.6)                  | 3189 (50.4)                | 0.044      | 1863 (52.1)                 | 134 (49.8)                  | 0.046      |
| Ischemic heart disease                                | 94 (7.4)                    | 320 (5.1)                  | 0.097      | 291 (8.1)                   | 30 (11.2)                   | 0.102      |
| Liver cirrhosis                                       | 5 (0.4)                     | 37 (0.6)                   | 0.027      | 28 (0.8)                    | 5 (1.9)                     | 0.094      |
| Osteoarthritis                                        | 487 (38.3)                  | 2305 (36.4)                | 0.038      | 1395 (39)                   | 99 (36.8)                   | 0.046      |
| Osteoporosis                                          | 166 (13)                    | 965 (15.2)                 | 0.063      | 459 (12.8)                  | 43 (16)                     | 0.09       |
| Parkinson's disease                                   | 4 (0.3)                     | 17 (0.3)                   | 0.008      | 12 (0.3)                    | 1 (0.4)                     | 0.006      |
| Rheumatoid arthritis                                  | 23 (1.8)                    | 153 (2.4)                  | 0.042      | 79 (2.2)                    | 6 (2.2)                     | 0.001      |
| Stroke                                                | 22 (1.7)                    | 154 (2.4)                  | 0.049      | 82 (2.3)                    | 13 (4.8)                    | 0.137      |
| Thyroid disease                                       | 84 (6.6)                    | 502 (7.9)                  | 0.051      | 266 (7.4)                   | 23 (8.6)                    | 0.041      |
| <b>Fall related medications</b>                       |                             |                            |            |                             |                             |            |
| ACE inhibitors or ARBs                                | 610 (47.9)                  | 2722 (43)                  | 0.099      | 1844 (51.6)                 | 151 (56.1)                  | 0.091      |
| Anticholinergics                                      | 1050 (82.5)                 | 5146 (81.3)                | 0.031      | 2964 (82.9)                 | 235 (87.4)                  | 0.125      |
| Benzodiazepines                                       | 490 (38.5)                  | 2415 (38.1)                | 0.007      | 1422 (39.8)                 | 126 (46.8)                  | 0.143      |
| beta-blockers                                         | 56 (4.4)                    | 302 (4.8)                  | 0.018      | 172 (4.8)                   | 10 (3.7)                    | 0.054      |
| Calcium channel blockers                              | 445 (35)                    | 2199 (34.7)                | 0.005      | 1257 (35.2)                 | 112 (41.6)                  | 0.133      |
| Diuretics                                             | 276 (21.7)                  | 1235 (19.5)                | 0.054      | 763 (21.3)                  | 47 (17.5)                   | 0.098      |
| Nitrates                                              | 10 (0.8)                    | 29 (0.5)                   | 0.042      | 37 (1)                      | 7 (2.6)                     | 0.117      |
| Opioids                                               | 120 (9.4)                   | 639 (10.1)                 | 0.022      | 404 (11.3)                  | 41 (15.2)                   | 0.116      |
| Sedative hypnotics                                    | 139 (10.9)                  | 685 (10.8)                 | 0.003      | 382 (10.7)                  | 39 (14.5)                   | 0.115      |
| Tricyclic antidepressant                              | 80 (6.3)                    | 388 (6.1)                  | 0.006      | 251 (7)                     | 25 (9.3)                    | 0.083      |
| Typical antipsychotics                                | 36 (2.8)                    | 222 (3.5)                  | 0.039      | 104 (2.9)                   | 13 (4.8)                    | 0.1        |
| <b>Osteoporosis medications</b>                       |                             |                            |            |                             |                             |            |
| Bisphosphonates                                       | 72 (5.7)                    | 516 (8.2)                  | 0.099      | 212 (5.9)                   | 22 (8.2)                    | 0.088      |
| Calcium/vitamin D                                     | 135 (10.6)                  | 746 (11.8)                 | 0.037      | 436 (12.2)                  | 48 (17.8)                   | 0.158      |
| Parathyroid hormone/calcitonin                        | 4 (0.3)                     | 28 (0.4)                   | 0.021      | 12 (0.3)                    | 0 (0)                       | 0.082      |
| RANKL inhibitors                                      | 12 (0.9)                    | 78 (1.2)                   | 0.028      | 42 (1.2)                    | 4 (1.5)                     | 0.027      |
| SERMs                                                 | 30 (2.4)                    | 139 (2.2)                  | 0.011      | 74 (2.1)                    | 9 (3.3)                     | 0.079      |
| <b>Comedications</b>                                  |                             |                            |            |                             |                             |            |
| Anticoagulants                                        | 41 (3.2)                    | 138 (2.2)                  | 0.064      | 133 (3.7)                   | 11 (4.1)                    | 0.019      |
| Anticonvulsants                                       | 172 (13.5)                  | 770 (12.2)                 | 0.04       | 580 (16.2)                  | 82 (30.5)                   | 0.342      |
| Antidepressants                                       | 113 (8.9)                   | 440 (6.9)                  | 0.071      | 287 (8)                     | 25 (9.3)                    | 0.045      |
| Oral corticosteroids                                  | 548 (43)                    | 2763 (43.6)                | 0.012      | 1437 (40.2)                 | 99 (36.8)                   | 0.07       |
| Hormone replacement therapy                           | 98 (7.7)                    | 475 (7.5)                  | 0.007      | 257 (7.2)                   | 24 (8.9)                    | 0.064      |
| Immunosuppressants                                    | 5 (0.4)                     | 40 (0.6)                   | 0.033      | 17 (0.5)                    | 3 (1.1)                     | 0.072      |
| NSAIDs                                                | 925 (72.7)                  | 4476 (70.7)                | 0.044      | 2631 (73.6)                 | 204 (75.8)                  | 0.051      |
| Platelet inhibitors                                   | 684 (53.7)                  | 3421 (54)                  | 0.006      | 2106 (58.9)                 | 190 (70.6)                  | 0.247      |
| Proton-pump inhibitors                                | 635 (49.9)                  | 3094 (48.9)                | 0.02       | 1870 (52.3)                 | 159 (59.1)                  | 0.137      |
| Statins                                               | 773 (60.7)                  | 3699 (58.4)                | 0.047      | 2623 (73.4)                 | 228 (84.8)                  | 0.282      |
| <b>Laboratory test results<sup>a</sup>, mean (SD)</b> |                             |                            |            |                             |                             |            |
| Waist circumference [cm]                              | 87.2 (9.5)                  | 84.1 (9.2)                 | 0.337      | 86.3 (9.7)                  | 86.2 (9.9)                  | 0.009      |
| Body mass index [kg/m <sup>2</sup> ]                  | 27.4 (3.9)                  | 25.8 (3.7)                 | 0.419      | 26.8 (4)                    | 26.1 (4.1)                  | 0.152      |
| Fasting blood glucose [mg/dL]                         | 145 (46.6)                  | 146.1 (49.9)               | 0.023      | 149.7 (49.1)                | 161.7 (64.7)                | 0.209      |
| Systolic blood pressure [mmHg]                        | 130.1 (16)                  | 129.2 (15.8)               | 0.058      | 129 (15.3)                  | 126.6 (16.1)                | 0.151      |
| Diastolic blood pressure [mmHg]                       | 78.7 (10)                   | 77.6 (9.9)                 | 0.118      | 77.1 (9.8)                  | 74.3 (9.6)                  | 0.29       |
| Serum creatinine [mg/dL]                              | 0.7 (0.2)                   | 0.7 (0.2)                  | 0.034      | 0.7 (0.2)                   | 0.8 (0.3)                   | 0.209      |
| AST (SGOT) [IU/L]                                     | 34.7 (25.1)                 | 32.5 (25.9)                | 0.087      | 32.8 (22.6)                 | 30 (18.1)                   | 0.137      |
| ALT (SGPT) [IU/L]                                     | 40.1 (47.9)                 | 34.3 (27.4)                | 0.147      | 35.2 (34.8)                 | 29.8 (21.4)                 | 0.186      |
| GGT [IU/L]                                            | 45 (42.3)                   | 41.8 (50.1)                | 0.069      | 41.1 (42.5)                 | 40.1 (65.6)                 | 0.019      |
| <b>Bone mineral density test results<sup>b</sup></b>  |                             |                            |            |                             |                             |            |
| T-score >= -1.0                                       | 560 (44)                    | 2316 (36.6)                | 0.151      | 1488 (41.6)                 | 110 (40.9)                  | 0.015      |
| -2.5 < T-score < -1.0                                 | 509 (40)                    | 2619 (41.4)                | 0.028      | 1456 (40.7)                 | 112 (41.6)                  | 0.018      |
| T-score <= -2.5                                       | 204 (16)                    | 1396 (22.1)                | 0.154      | 630 (17.6)                  | 47 (17.5)                   | 0.004      |

**Abbreviations:** ASD, absolute standardized difference; AST, aspartate aminotransferase; ALT, alanine aminotransferase; DPP4i, dipeptidyl peptidase 4 inhibitors; GGT, gamma glutamyl transferase; GLP1RA, glucagon like peptide 1 receptor agonists; SD, standard deviation; SGLT2i, sodium glucose cotransporter 2 inhibitors; SGOT, serum glutamic oxaloacetic transaminase; SGPT, serum glutamic pyruvate transaminase.

<sup>a</sup>Laboratory test results were assessed within 3 years prior to the index date and the most recent value was included.

<sup>b</sup>Bone mineral density tests were conducted using DXA (dual-energy X-ray absorptiometry). The test results were assessed within 3 years prior to the index date and the most recent value was included.

**eTable 13. Association between the use of SGLT2 inhibitors and the risk of overall fractures among weighted populations with bone mineral density test results present.**

| Exposure                 | Patients <sup>a</sup> | Events | Person-years | Weighted IR <sup>b</sup><br>(95% CI) | Weighted HR<br>(95% CI) |
|--------------------------|-----------------------|--------|--------------|--------------------------------------|-------------------------|
| <b>SGLT2i vs. DPP4i</b>  |                       |        |              |                                      |                         |
| SGLT2 inhibitors         | 1,257                 | 13     | 1,021        | 1.29 (0.68-2.20)                     | 1.06 (0.58-1.96)        |
| DPP4 inhibitors          | 6,103                 | 79     | 5,785        | 1.22 (0.94-1.55)                     | 1.00 [Reference]        |
| <b>SGLT2i vs. GLP1RA</b> |                       |        |              |                                      |                         |
| SGLT2 inhibitors         | 2,514                 | 34     | 2,931        | 1.24 (0.81-1.81)                     | 1.27 (0.30-5.49)        |
| GLP-1 receptor agonists  | 250                   | 2      | 169          | 0.67 (0.02-3.71)                     | 1.00 [Reference]        |

**Abbreviations:** CI, confidence interval; DPP4i, dipeptidyl peptidase 4 inhibitors; GLP1RA, glucagon like peptide 1 receptor agonists; HR, hazard ratio; IR, incidence rate; SGLT2i, sodium glucose cotransporter 2 inhibitors

<sup>a</sup>Patients remained after trimming patients in the non-overlapping regions of the propensity score distributions.

<sup>b</sup>per 100 person-years

**eFigure 3. Cumulative incidence function plots for overall fractures among weighted populations**

**(A) SGLT2 inhibitors vs. DPP4 inhibitors**

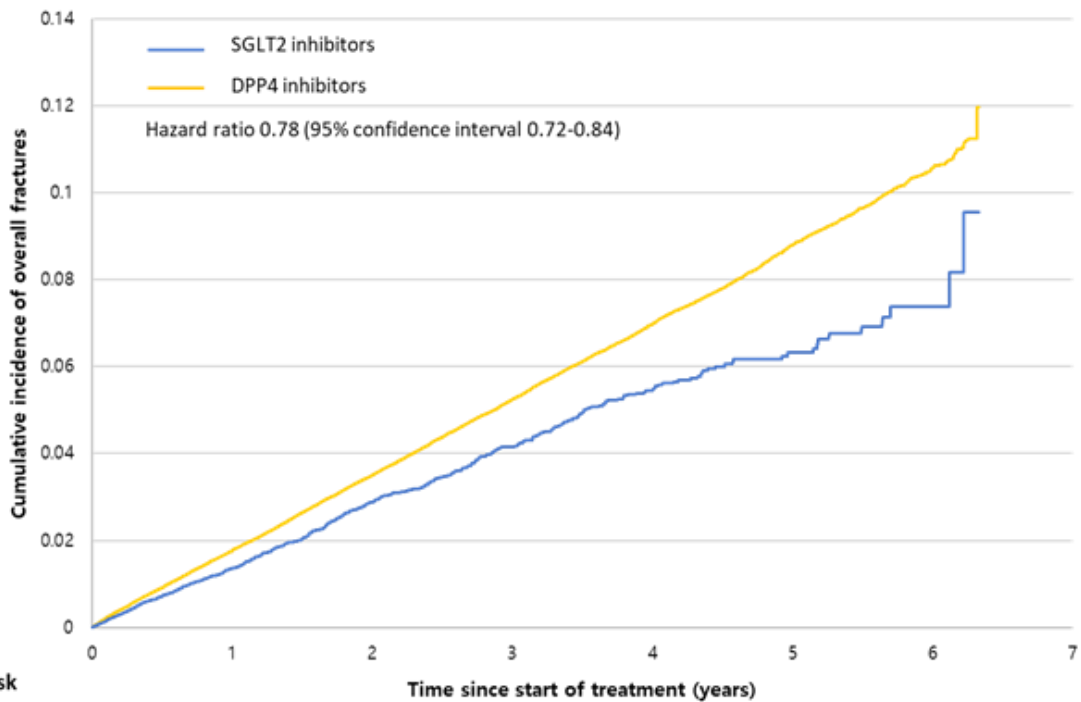

| Number at risk  | Time since start of treatment (years) |        |        |       |       |       |      |   |
|-----------------|---------------------------------------|--------|--------|-------|-------|-------|------|---|
|                 | 0                                     | 1      | 2      | 3     | 4     | 5     | 6    | 7 |
| SGLT2 inhibitor | 37530                                 | 17786  | 10161  | 5982  | 2905  | 1120  | 194  | 0 |
| DPP4 inhibitor  | 332004                                | 186150 | 117680 | 75842 | 41184 | 17868 | 3876 | 0 |

**(B) SGLT2 inhibitors vs. GLP-1 receptor agonists**

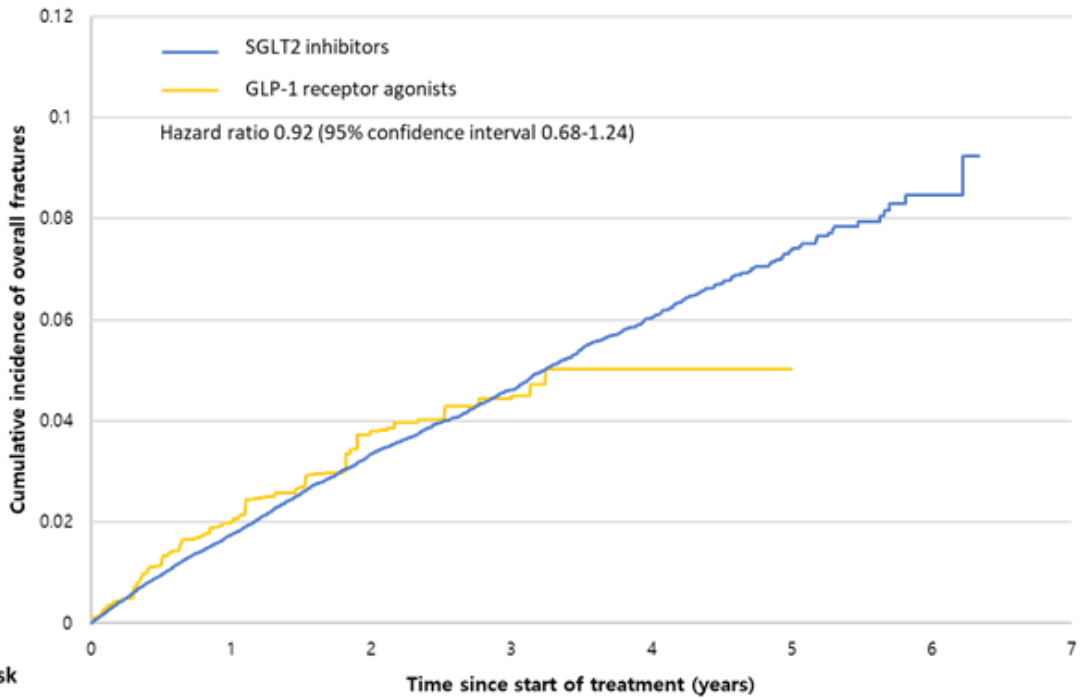

| Number at risk          | Time since start of treatment (years) |       |       |       |      |      |     |   |
|-------------------------|---------------------------------------|-------|-------|-------|------|------|-----|---|
|                         | 0                                     | 1     | 2     | 3     | 4    | 5    | 6   | 7 |
| SGLT2 inhibitor         | 111835                                | 53158 | 28868 | 16339 | 7463 | 2296 | 309 | 0 |
| GLP-1 receptor agonists | 8177                                  | 1741  | 721   | 380   | 87   | 0    | 0   | 0 |

**Abbreviations:** DPP4, dipeptidyl peptidase 4; GLP-1, glucagon like peptide 1; SGLT2, sodium glucose cotransporter 2



**eFigure 4. Overall study design**

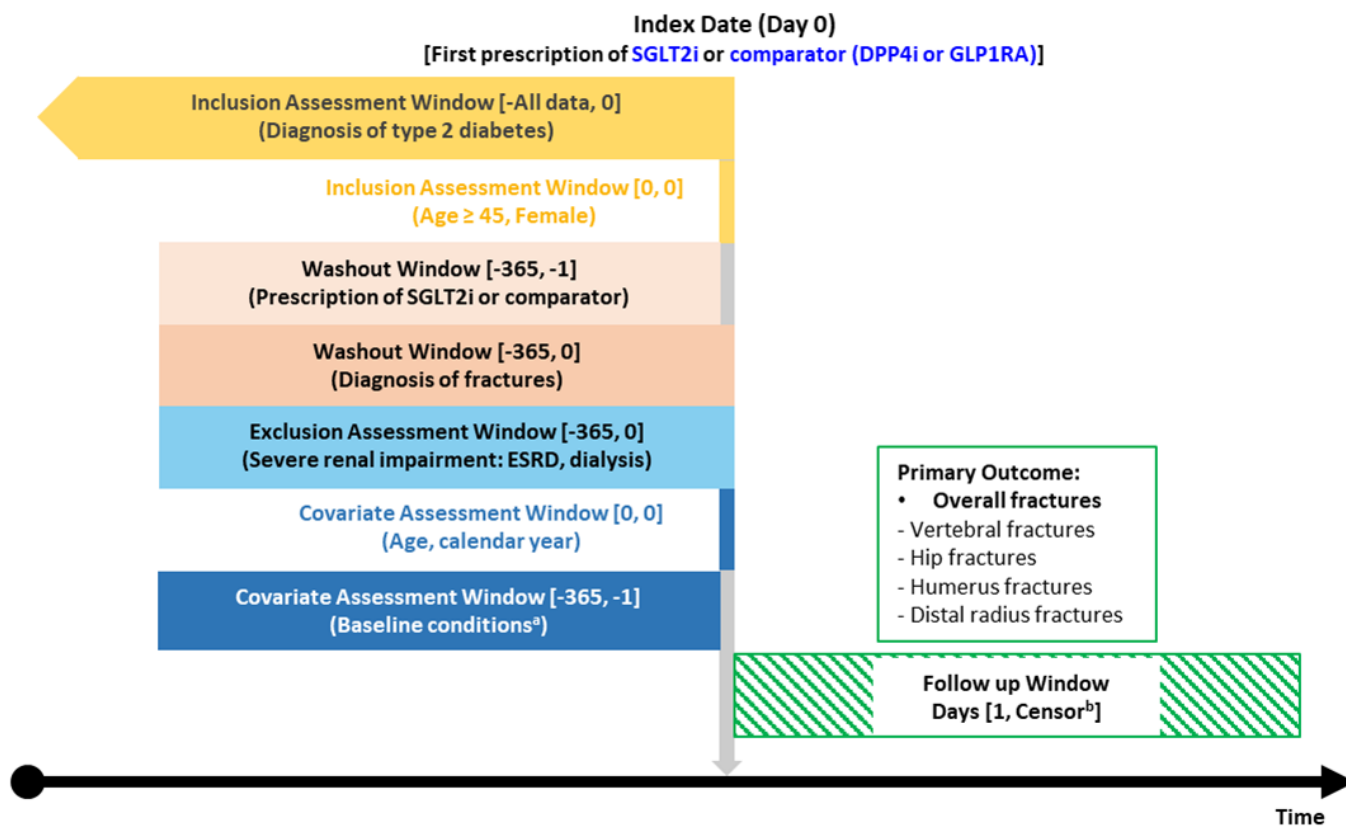

**Abbreviations:** DPP4i, dipeptidyl peptidase 4 inhibitor; ESRD, end-stage renal disease; GLP1RA, glucagon-like peptide 1 receptor agonist; SGLT2i, sodium glucose cotransporter 2 inhibitor

<sup>a</sup>Baseline conditions include diabetic related conditions, other comorbidities, fall related medications, diabetic medications, osteoporosis medications, other comedications, Charlson Comorbidity Index (CCI), proxies for diabetes and overall health status

<sup>b</sup>Earliest of the outcome of interest (fractures), switching or discontinuation of study drugs, death, end of the study period

**eFigure 5. Propensity score distribution of before and after weighting in both cohorts**

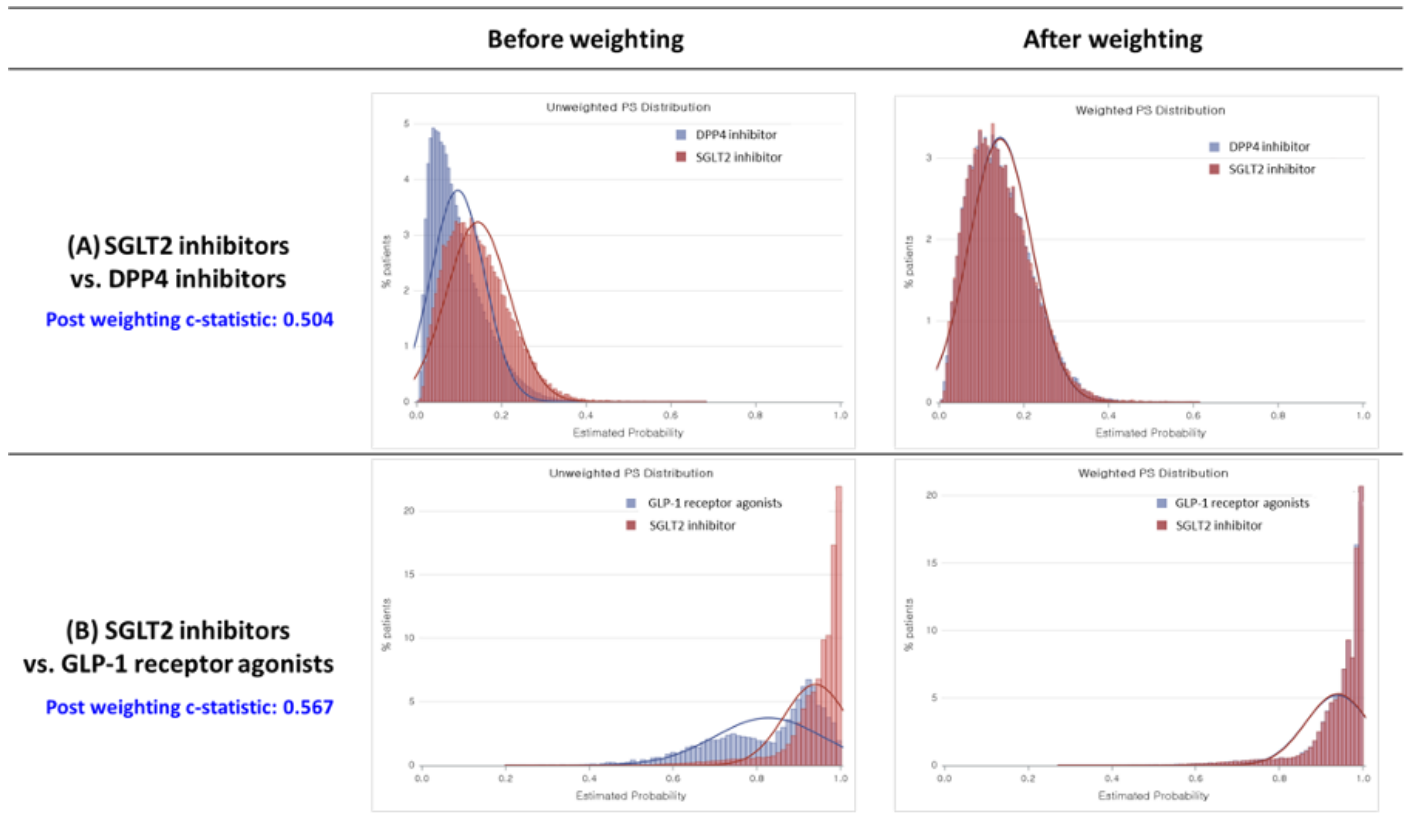

**Abbreviations:** DPP4, dipeptidyl peptidase 4; GLP-1, glucagon-like peptide 1; SGLT2, sodium glucose cotransporter 2

**eTable 14. International Classification of Diseases-10 (ICD-10) and domestic procedure codes for identification of fractures**

| Outcomes                                                | Description                                                    | Codes                                         |              |
|---------------------------------------------------------|----------------------------------------------------------------|-----------------------------------------------|--------------|
|                                                         | Fracture of neck                                               | S12                                           |              |
|                                                         | Fracture of thoracic vertebra                                  | S22.0                                         |              |
|                                                         | Multiple fractures of thoracic spine                           | S22.1                                         |              |
|                                                         | Fracture of lumbar vertebra                                    | S32.0                                         |              |
|                                                         | Multiple fractures of lumbar spine and pelvis                  | S32.7                                         |              |
|                                                         | Fracture of spine, level unspecified                           | T08                                           |              |
|                                                         | Fatigue fracture of vertebra                                   | M48.4                                         |              |
| Vertebral fractures                                     | Collapsed vertebra, NEC                                        | M48.5                                         |              |
|                                                         | Collapsed vertebra in diseases classified elsewhere            | M49.5                                         |              |
|                                                         | Percutaneous vertebroplasty                                    | N0471, N0472                                  |              |
|                                                         | Percutaneous balloon kyphoplasty                               | N0473, N0474                                  |              |
|                                                         | Closed reduction of fracture and/or dislocated spine           | N0630                                         |              |
|                                                         | Thoracic spine radiographic study                              | G430                                          |              |
|                                                         | Thoracolumbar spine radiographic study                         | G440                                          |              |
|                                                         | Lumbar spine radiographic study                                | G450                                          |              |
|                                                         | Lumbosacral spine radiographic study                           | G460                                          |              |
|                                                         | Fracture of neck of femur                                      | S72.0                                         |              |
|                                                         | Pertrochanteric fracture                                       | S72.1                                         |              |
|                                                         | Subtrochanteric fracture                                       | S72.2                                         |              |
|                                                         | Hip fractures                                                  | Open reduction of fractured extremity (femur) | N0601, N0611 |
|                                                         |                                                                | Closed pinning for femur                      | N0991        |
| External fixation for pelvis or femur                   |                                                                | N0981                                         |              |
| Closed reduction of fractured extremity (pelvis, femur) |                                                                | N0641                                         |              |
| Bone traction                                           |                                                                | N0652                                         |              |
| Skin traction                                           |                                                                | N0654                                         |              |
| Total arthroplasty (hip)                                |                                                                | N0711, N2070                                  |              |
| Hemiarthroplasty (hip)                                  |                                                                | N0715, N2710                                  |              |
| Fracture of upper end of humerus                        |                                                                | S42.2                                         |              |
| Fracture of shaft of humerus                            |                                                                | S42.3                                         |              |
| Humerus fractures                                       | Fracture of lower end of humerus                               | S42.4                                         |              |
|                                                         | Open reduction with internal fixation for humerus or scapula   | N0602, N0612                                  |              |
|                                                         | Closed pinning for humerus or scapula                          | N0992                                         |              |
|                                                         | Replacement hemiarthroplasty-shoulder                          | N2711, N2716                                  |              |
|                                                         | Replacement total arthroplasty-shoulder                        | N2071, N2076                                  |              |
|                                                         | Shoulder spica                                                 | T6010                                         |              |
|                                                         | Velpeau cast                                                   | T6110                                         |              |
|                                                         | Fracture of lower end of radius                                | S52.5                                         |              |
|                                                         | Fracture of lower end of both ulna and radius                  | S52.6                                         |              |
|                                                         | Open reduction with internal fixation for radius               | N0607, N0617                                  |              |
| Distal radius fractures                                 | Open reduction with internal fixation for both radius and ulna | N0603, N0613                                  |              |
|                                                         | Percutaneous pinning for radius                                | N0933                                         |              |
|                                                         | Percutaneous pinning for radius and ulna                       | N0994                                         |              |
|                                                         | External fixation for forearm bone                             | N0983                                         |              |
|                                                         | Long-arm cast                                                  | T6020                                         |              |
|                                                         | Short-arm cast                                                 | T6030                                         |              |

**eTable 15. International Classification of Diseases-10 (ICD-10) codes for identification of covariates**

| Covariates                          | Definitions <sup>a</sup>                                                                                                                                                                                                                                                                                                                                                                                                                                                                                                                                                                                                                                                                                                   |
|-------------------------------------|----------------------------------------------------------------------------------------------------------------------------------------------------------------------------------------------------------------------------------------------------------------------------------------------------------------------------------------------------------------------------------------------------------------------------------------------------------------------------------------------------------------------------------------------------------------------------------------------------------------------------------------------------------------------------------------------------------------------------|
| <b>Diabetes related conditions</b>  |                                                                                                                                                                                                                                                                                                                                                                                                                                                                                                                                                                                                                                                                                                                            |
| Diabetic nephropathy                | E10.2: Type 1 diabetes mellitus with kidney complications<br>E11.2: Type 2 diabetes mellitus with kidney complications<br>E13.2: Other specified diabetes mellitus with kidney complications                                                                                                                                                                                                                                                                                                                                                                                                                                                                                                                               |
| Diabetic neuropathy                 | E10.4: Type 1 diabetes mellitus with neurological complications<br>E11.4: Type 2 diabetes mellitus with neurological complications<br>E13.4: Other specified diabetes mellitus with neurological complications<br>G53: Cranial nerve disorders in diseases classified elsewhere<br>G56: Mononeuropathies of upper limb<br>G57: Mononeuropathies of lower limb<br>G58: Other mononeuropathies<br>G59: Mononeuropathy in diseases classified elsewhere<br>G64: Other disorders of peripheral nervous system<br>G62.9: Polyneuropathy, unspecified<br>G90.0: Idiopathic peripheral autonomic neuropathy<br>G90.8: Other disorders of autonomic nervous system<br>G99.0: Autonomic neuropathy in diseases classified elsewhere |
| Diabetic retinopathy                | E10.3: Type 1 diabetes mellitus with ophthalmic complications<br>E11.3: Type 2 diabetes mellitus with ophthalmic complications<br>E13.3: Other specified diabetes mellitus with ophthalmic complications<br>H33, H34, H35, H36, H54                                                                                                                                                                                                                                                                                                                                                                                                                                                                                        |
| Hypoglycemia                        | E16.0: Other disorders of pancreatic internal secretion<br>E16.1: Other hypoglycaemia<br>E16.2: Hypoglycaemia, unspecified<br>E11.63: Type 2 diabetes mellitus, with hypoglycemia<br>E13.63: Other specified diabetes mellitus, with hypoglycemia<br>E14.63: Unspecified diabetes mellitus, with hypoglycemia                                                                                                                                                                                                                                                                                                                                                                                                              |
| <b>Charlson Comorbidity Index</b>   |                                                                                                                                                                                                                                                                                                                                                                                                                                                                                                                                                                                                                                                                                                                            |
| Chronic pulmonary disease           | ICD-10: I278, I279, J40, J41, J42, J43, J44, J45, J46, J47, J60, J61, J62, J63, J64, J65, J66, J67, J684, J701, J703                                                                                                                                                                                                                                                                                                                                                                                                                                                                                                                                                                                                       |
| Rheumatic disease                   | ICD-10: M05, M06, M315, M32, M33, M34, M351, M353, M360                                                                                                                                                                                                                                                                                                                                                                                                                                                                                                                                                                                                                                                                    |
| Diabetes with chronic complications | ICD-10: E102, E103, E104, E105, E107, E112, E113, E114, E115, E117, E122, E123, E124, E125, E127, E132, E133, E134, E135, E137, E142, E143, E144, E145, E147                                                                                                                                                                                                                                                                                                                                                                                                                                                                                                                                                               |
| Renal disease                       | ICD-10: I120, I131, N032, N033, N034, N035, N036, N037, N052, N053, N054, N055, N056, N057, N18, N19, N250, Z490, Z491, Z492, Z940, Z992                                                                                                                                                                                                                                                                                                                                                                                                                                                                                                                                                                                   |
| Congestive heart failure            | ICD-10: I099, I110, I130, I132, I255, I420, I425, I426, I427, I428, I429, I43, I50, P290                                                                                                                                                                                                                                                                                                                                                                                                                                                                                                                                                                                                                                   |
| Dementia                            | ICD-10: F00, F01, F02, F03, F051, G30, G311                                                                                                                                                                                                                                                                                                                                                                                                                                                                                                                                                                                                                                                                                |
| Mild liver disease                  | ICD-10: B18, K700, K701, K702, K703, K709, K713, K714, K715, K717, K73, K74, K760, K762, K763, K764, K768, K769, Z944                                                                                                                                                                                                                                                                                                                                                                                                                                                                                                                                                                                                      |
| Hemiplegia or paraplegia            | ICD-10: G041, G114, G801, G802, G81, G82, G830, G831, G832, G833, G834, G839                                                                                                                                                                                                                                                                                                                                                                                                                                                                                                                                                                                                                                               |

|                                                                                    |                                                                                                                                                                                                                                                                                                                                                                                                                                       |
|------------------------------------------------------------------------------------|---------------------------------------------------------------------------------------------------------------------------------------------------------------------------------------------------------------------------------------------------------------------------------------------------------------------------------------------------------------------------------------------------------------------------------------|
| Any malignancy, including lymphoma and leukemia, except malignant neoplasm of skin | ICD-10: C00, C01, C02, C03, C04, C05, C06, C07, C08, C09, C10, C11, C12, C13, C14, C15, C16, C17, C18, C19, C20, C21, C22, C23, C24, C25, C26, C30, C31, C32, C33, C34, C37, C38, C39, C40, C41, C43, C45, C46, C47, C48, C49, C50, C51, C52, C53, C54, C55, C56, C57, C58, C60, C61, C62, C63, C64, C65, C66, C67, C68, C69, C70, C71, C72, C73, C74, C75, C76, C81, C82, C83, C84, C85, C88, C90, C91, C92, C93, C94, C95, C96, C97 |
| Moderate or severe liver disease                                                   | ICD-10: I850, I859, I864, I982, K704, K711, K721, K729, K765, K766, K767                                                                                                                                                                                                                                                                                                                                                              |
| AIDS/HIV                                                                           | ICD-10: B20, B21, B22, B24                                                                                                                                                                                                                                                                                                                                                                                                            |
| Metastatic solid tumor                                                             | ICD-10: C77, C78, C79, C80                                                                                                                                                                                                                                                                                                                                                                                                            |

#### Other comorbidities

| Covariates               | Definitions <sup>a</sup>                                                                                                                                                                                                                                                                                                                                                                                                                                                                                                                                                     |
|--------------------------|------------------------------------------------------------------------------------------------------------------------------------------------------------------------------------------------------------------------------------------------------------------------------------------------------------------------------------------------------------------------------------------------------------------------------------------------------------------------------------------------------------------------------------------------------------------------------|
| Asthma                   | J45: Asthma<br>J46: Status asthmaticus                                                                                                                                                                                                                                                                                                                                                                                                                                                                                                                                       |
| All other cancer         | Any malignancy, including lymphoma and leukemia, metastatic solid tumor, except malignant neoplasm of skin and breast cancer<br>C00, C01, C02, C03, C04, C05, C06, C07, C08, C09, C10, C11, C12, C13, C14, C15, C16, C17, C18, C19, C20, C21, C22, C23, C24, C25, C26, C30, C31, C32, C33, C34, C37, C38, C39, C40, C41, C43, C45, C46, C47, C48, C49, C51, C52, C53, C54, C55, C56, C57, C58, C60, C61, C62, C63, C64, C65, C66, C67, C68, C69, C70, C71, C72, C73, C74, C75, C76, C77, C78, C79, C80, C81, C82, C83, C84, C85, C88, C90, C91, C92, C93, C94, C95, C96, C97 |
| Breast cancer            | C50: Malignant neoplasm of breast                                                                                                                                                                                                                                                                                                                                                                                                                                                                                                                                            |
| Chronic kidney disease   | N181: Chronic kidney disease, stage 1<br>N182: Chronic kidney disease, stage 2<br>N183: Chronic kidney disease, stage 3<br>N184: Chronic kidney disease, stage 4<br>N189: Chronic kidney disease, unspecified<br>N19: Unspecified kidney failure                                                                                                                                                                                                                                                                                                                             |
| Congestive heart failure | I50: Heart failure<br>I110: Hypertensive heart disease with (congestive) heart failure<br>I130: Hypertensive heart and renal disease with (congestive) heart failure<br>I132: Hypertensive heart and renal disease with both (congestive) heart failure and renal failure                                                                                                                                                                                                                                                                                                    |
| COPD                     | J41: Simple and mucopurulent chronic bronchitis<br>J42: Unspecified chronic bronchitis<br>J43: Emphysema<br>J44: Other chronic obstructive pulmonary disease                                                                                                                                                                                                                                                                                                                                                                                                                 |
| Dementia                 | F01: Vascular dementia<br>F02: Dementia in other diseases classified elsewhere<br>F03: Unspecified dementia<br>G30: Alzheimer's disease<br>G310: Circumscribed brain atrophy<br>F00: Dementia in Alzheimer's disease<br>F051: Delirium superimposed on dementia<br>G311: Senile degeneration of brain, NEC                                                                                                                                                                                                                                                                   |
| Epilepsy                 | G40: Epilepsy<br>G41: Status epilepticus                                                                                                                                                                                                                                                                                                                                                                                                                                                                                                                                     |
| Gout                     | M10: Gout                                                                                                                                                                                                                                                                                                                                                                                                                                                                                                                                                                    |
| Hyperlipidemia           | E78: Disorders of lipoprotein metabolism and other lipidaemias                                                                                                                                                                                                                                                                                                                                                                                                                                                                                                               |
| Hypertension             | I10: Essential(primary) hypertension<br>I11: Hypertensive heart disease<br>I12: Hypertensive renal disease<br>I13: Hypertensive heart and renal disease<br>I15: Secondary hypertension                                                                                                                                                                                                                                                                                                                                                                                       |

| Ischemic heart disease | I21: Acute myocardial infarction<br>I22: Subsequent myocardial infarction<br>I20: Angina pectoris<br>I25: Chronic ischaemic heart disease                                                                  |
|------------------------|------------------------------------------------------------------------------------------------------------------------------------------------------------------------------------------------------------|
| Liver cirrhosis        | K703: Alcoholic cirrhosis of liver<br>K717: Toxic liver disease with fibrosis and cirrhosis of liver<br>K74: Fibrosis and cirrhosis of liver                                                               |
| Osteoarthritis         | M15: Polyarthrosis<br>M16: Coxarthrosis [arthrosis of hip]<br>M17: Gonarthrosis [arthrosis of knee]<br>M18: Arthrosis of first carpometacarpal joint<br>M19: Other arthrosis                               |
| Osteoporosis           | M80: Osteoporosis with pathological fracture<br>M81: Osteoporosis without pathological fracture<br>M82: Osteoporosis in diseases classified elsewhere                                                      |
| <b>Covariates</b>      | <b>Definitions<sup>a</sup></b>                                                                                                                                                                             |
| Parkinson's disease    | G20: Parkinson's disease                                                                                                                                                                                   |
| Rheumatoid arthritis   | M05: Seropositive rheumatoid arthritis<br>M06: Other rheumatoid arthritis                                                                                                                                  |
| Stroke                 | I60: Subarachnoid haemorrhage<br>I61: Intracerebral haemorrhage<br>I62: Other nontraumatic intracranial haemorrhage<br>I63: Cerebral infarction<br>I64: Stroke, not specified as haemorrhage or infarction |
| Thyroid disease        | E02: Subclinical iodine-deficiency hypothyroidism<br>E03: Other hypothyroidism<br>E05: Thyrotoxicosis<br>E06: Thyroiditis<br>E07: Other disorders of thyroid                                               |

<sup>a</sup>Comorbidities were ascertained from hospitalization or physician claims data (at least one inpatient or outpatient diagnosis in primary or secondary position) in a year prior to the index date.

**eTable 16. Anatomical Therapeutic Chemical (ATC) classification codes for identification of covariates**

| Covariates                      | Definitions <sup>a</sup>                                                                                                                                         |
|---------------------------------|------------------------------------------------------------------------------------------------------------------------------------------------------------------|
| <b>Fall-related medications</b> |                                                                                                                                                                  |
| ACEi or ARBs                    | C09C, C09D, C09A, C09B                                                                                                                                           |
| Anticholinergics                | R06A                                                                                                                                                             |
| Benzodiazepines                 | N03AE, N05BA, N05CD                                                                                                                                              |
| β-Blockers                      | C07                                                                                                                                                              |
| Calcium channel blockers        | C08, C07FB, C09BB, C09DB                                                                                                                                         |
| Diuretics                       | C03A, C07B, C07D, C03C, C03E, C03X, C07C, C08G                                                                                                                   |
| Nitrates                        | C01DA08                                                                                                                                                          |
| Opioids                         | N02A                                                                                                                                                             |
| Sedative hypnotics              | N03AA, N05BE01, N05CA, N05CC01, N05CF                                                                                                                            |
| Tricyclic antidepressant        | N06AA02, N06AA04, N06AA09, N06AA10, N06AA12, N06AA17, N06CA01                                                                                                    |
| Antipsychotics                  | N05AA, N05AD, N05AE, N05AF, N05AG, N05AH, N05AL, N05AX                                                                                                           |
| <b>Osteoporosis medications</b> |                                                                                                                                                                  |
| Bisphosphonates                 | M05BA, M05BB                                                                                                                                                     |
| Calcium/vitamin D               | A12AA04, A12AA13, A12AX                                                                                                                                          |
| Parathyroid hormone/calcitonin  | H05AA, H05BA                                                                                                                                                     |
| RANKL inhibitors                | M05BX04                                                                                                                                                          |
| SERMs                           | G03XC                                                                                                                                                            |
| <b>Antihyperglycemic agents</b> |                                                                                                                                                                  |
| SGLT2 inhibitors                | A10BK                                                                                                                                                            |
| DPP4 inhibitors                 | A10BH                                                                                                                                                            |
| GLP-1 receptor agonists         | A10BJ                                                                                                                                                            |
| α-Glucosidase inhibitors        | A10BF                                                                                                                                                            |
| Insulin                         | A10A                                                                                                                                                             |
| Meglitinides                    | A10BX02, A10BX03, A10BX08                                                                                                                                        |
| Metformin                       | A10BA02                                                                                                                                                          |
| Sulfonylureas                   | A10BB                                                                                                                                                            |
| Thiazolidinediones              | A10BG                                                                                                                                                            |
| Combinations                    | A10BD                                                                                                                                                            |
| <b>Other comedications</b>      |                                                                                                                                                                  |
| Anticoagulants                  | B01AA, B01AB01, B01AB04, B01AB05, B01AB06, B01AB07, B01AB08, B01AB012, B10AF01, B10AF02, B10AF03, B01AX05                                                        |
| Anticonvulsants                 | N02BF, N03AB02, N03AB03, N03AB05, N03AB52, N03AD01, N03AD51, N03AF, N03AG01, N03AG04, N03AX                                                                      |
| Antidepressants                 | N06AB, N06AX11, N06AX16, N06AX21, N06AX23                                                                                                                        |
| Aromatase inhibitors            | L02BG03, L02BG06, L02BG04                                                                                                                                        |
| Oral corticosteroids            | H02AA02, H02AB, H02BX                                                                                                                                            |
| Hormone replacement therapy     | G03CA57, G03CX, G03DB01, G03DB08, G03F, G03H, G03XA01                                                                                                            |
| Immunosuppressants              | L04A                                                                                                                                                             |
| NSAIDs                          | M01AB05, M01AB08, M01AB15, M01AB16, M01AC01, M01AC06, M01AC56, M01AE01, M01AE02, M01AE03, M01AE04, M01AE09, M01AE13, M01AE14, M01AE17, M01AH01, M01AH05, M01AH07 |
| Platelet inhibitors             | B01AC, B01AD01, B01AD04, B01AD11                                                                                                                                 |
| Proton-pump inhibitors          | A02BC                                                                                                                                                            |
| Statins                         | C01AA                                                                                                                                                            |

**Abbreviations:** ACE, angiotensin converting enzyme; ARBs, angiotensin receptor blockers; DPP4i, dipeptidyl peptidase 4 inhibitors; GLP1RA, glucagon like peptide 1 receptor agonists; NSAIDs, nonsteroidal anti-inflammatory drugs; RANKL, receptor activator of nuclear factors kappa B ligand; SERMs, selective estrogen receptor modulator; SGLT2i, sodium glucose cotransporter 2 inhibitors

<sup>a</sup>Comedications were assessed in a year prior to the index date.
