# Supplementary material for: Sodium-Glucose Cotransporter 2 Inhibitors vs Incretin-Based Drugs and Risk of Fractures for Type 2 Diabetes
Source: PubMed Central journal article supplement (PMC10523172; doi:10.1001/jamanetworkopen.2023.35797), 2023-09-26
Supplement: jamanetwopen-e2335797-s002.pdf [file jamanetwopen-e2335797-s002.pdf]

## Data Sharing Statement

Ko. Sodium-Glucose Cotransporter 2 Inhibitors vs Incretin-Based Drugs and Risk Of Fractures For Type 2 Diabetes. *JAMA Netw Open*. Published September 26, 2023.  
doi:10.1001/jamanetworkopen.2023.35797

### Data

**Data available:** No
